# Supplementary material
Source: ML conference proceedings conference paper supplement (https://proceedings.neurips.cc/paper_files/paper/2020/hash/2794f6a20ee0685f4006210f40799acd-Abstract.html)

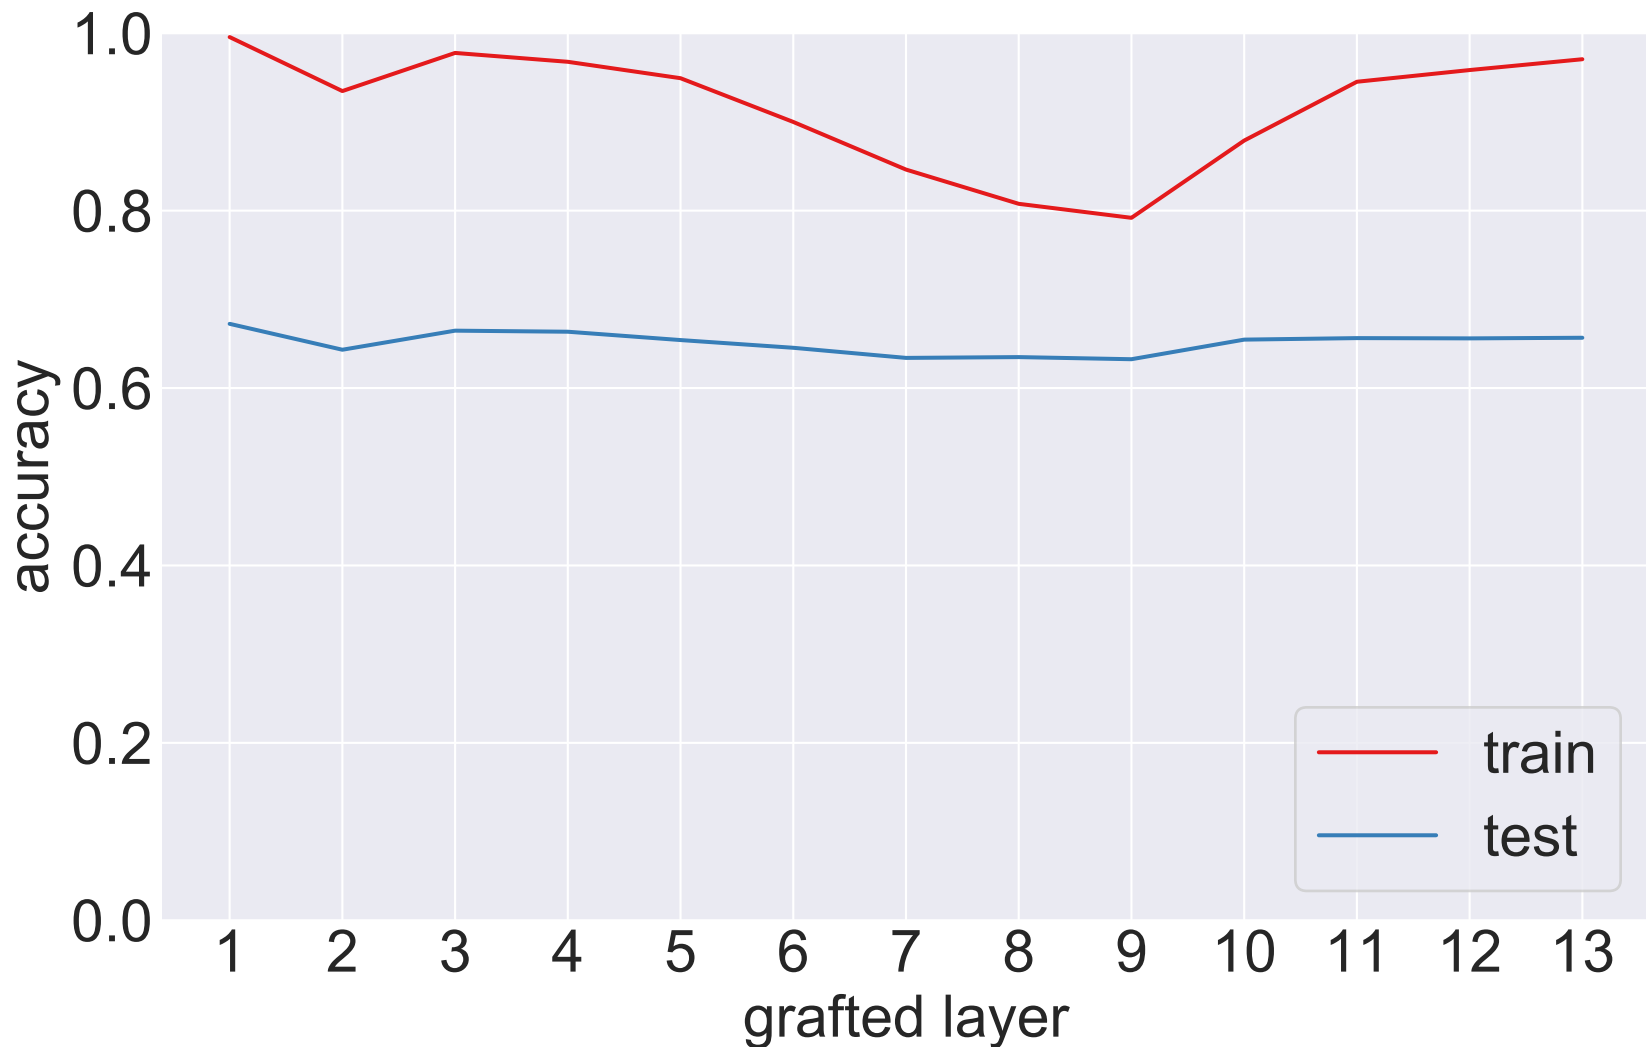

Supplement: Supplementary file [file 2794f6a20ee0685f4006210f40799acd-Supplemental.zip]
