# Supplementary material
Source: ML conference proceedings conference paper supplement (https://proceedings.neurips.cc/paper_files/paper/2020/hash/2794f6a20ee0685f4006210f40799acd-Abstract.html)
Supplement: Supplementary file [file 2794f6a20ee0685f4006210f40799acd-Supplemental.zip]

---

# How to Characterize The Landscape of Overparameterized Convolutional Neural Networks

---

Anonymous Author(s)

Affiliation

Address

email

## Abstract

1 For many initialization schemes, parameters of two randomly initialized deep neural  
2 networks (DNNs) can be quite different, but feature distributions of the hidden  
3 nodes are similar at each layer. With the help of a new technique called *neural*  
4 *network grafting*, we demonstrate that even during the entire training process,  
5 feature distributions of differently initialized networks remain similar at each layer.  
6 In this paper, we present an explanation of this phenomenon. Specifically, we  
7 consider the loss landscape of an overparameterized convolutional neural network  
8 (CNN) in the continuous limit, where the numbers of channels/hidden nodes in  
9 the hidden layers go to infinity. Although the landscape of the overparameterized  
10 CNN is still non-convex with respect to the trainable parameters, we show that very  
11 surprisingly, it can be reformulated as a convex function with respect to the feature  
12 distributions in the hidden layers. Therefore by reparameterizing neural networks  
13 in terms of feature distributions, we obtain a much simpler characterization of the  
14 landscape of overparameterized CNNs. We further argue that training with respect  
15 to network parameters leads to a fixed trajectory in the feature distributions.

## 16 1 Introduction

17 A good characterization of the landscape is very important for understanding remarkable successes of  
18 DNNs in various domains including computer vision, nature language processing and speech. There  
19 have been a lot of research [29, 21, 24, 20, 26, 8] analyzing the landscape of deep neural network in  
20 parameter space. On one hand, even one-hidden-layer neural network has complex landscape with  
21 exponential number of local minima and saddle points. On the other hand, some interesting empirical  
22 phenomena like *mode connectivity*, that low-cost solutions of DNN could be connected by simple  
23 path in parameter space, have been found, indicating that the loss landscape is not as complex as we  
24 expected. These two conclusions of the landscape in parameter space seem to be contradictory.

25 We believe that the loss landscape should be investigated in the feature distribution space directly  
26 instead of the parameter space as existing studies have done due to the excellent capability of  
27 DNN to learn effective feature representations. But our understanding on the feature distribution  
28 learned by DNNs is still limited. For example, even to the basic question of to what extent two  
29 feature representations learned by different DNNs are essentially the same, various studies such  
30 as [23, 32, 19] reached different conclusions due to the redundancy in the feature representations  
31 comes from the special properties of DNNs, e.g., the permutation&scale invariance of the trainable  
32 parameters, the truncation operation in ReLU, etc. Two feature representations that look quite  
33 different at current layer could be essentially the same. As the example illustrated in Fig. 1(b), the  
34 difference may have little effect on the features in subsequent layers and could be alleviated, or even  
35 eliminated completely after passing the linear transformations and the activation functions ReLU  
36 in the subsequent layers. Although several remedies are proposed in recent studies, the redundancy

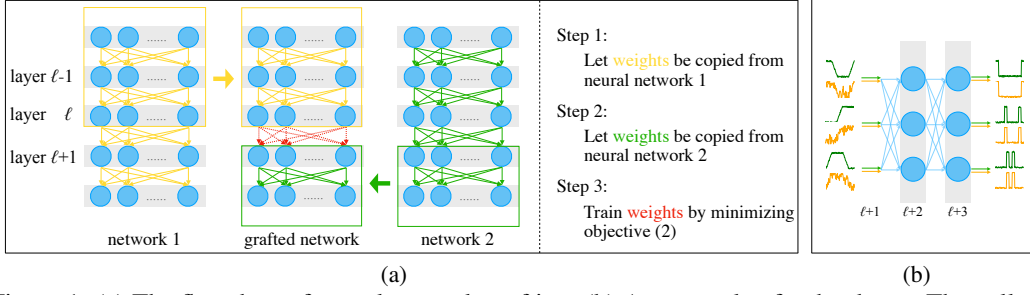

Figure 1: (a) The flowchart of neural network grafting. (b) An example of redundancy. The yellow and green curves left represent the features in layer  $\ell + 1$  learned in two nets. They look different but are essential similar since they become the same after passing two more layers.

cannot be completely eliminated and different amounts of redundancy may lead to inconsistent conclusions. This discourages the researchers from investigating DNNs in feature distribution space.

In this paper, we start from the problem of inconsistent conclusions above and propose an effective technique named *neural network grafting* (NNG) for comparing feature distributions (see Section 4). We consider the most direct way to identify whether the feature representations learned in two hidden layers of two networks are essentially the same. The key idea is to check whether the representation learned by one network can be used in the other one without significant sacrifice in accuracy, i.e., whether one of these two networks can be grafted onto the other at that hidden layer (Fig. 1(a)). Using NNG, we find that feature distributions learned by two networks with the same architecture but different initializations are almost the same during the *whole* training process. That means their solution paths, if we view them in the aspect of feature distributions, are the same, while they seem chaotic and quite different under the view of trainable parameters (see Section 6.1).

Our surprising finding on the uniqueness of the solution path implies that NNs become much easier to understand if we view them in the aspect of feature distributions instead of trainable parameters. This motivates us to reparameterize NNs with respect to the feature function distributions to obtain a simpler loss landscape. Specifically, we first propose a new method to reformulate a CNN as an approximation to a continuous CNN, which is obtained by letting the number of channels/hidden nodes in each hidden layer go to infinity. We then extend the emerging technique for reformulating fully connected NNs [4, 5] to continuous CNN to reparameterize it with respect to feature distributions (See Section 5). We show that although the loss of continuous CNN is still non-convex with respect to the trainable parameters, it becomes convex with respect to the feature distributions. Therefore, we obtain a much simpler characterization for the loss landscape.

Although our convexity is reformulated in the feature distribution space instead of the trainable parameter space, it has significant implications on NN optimization. In fact, it can be shown that under suitable conditions, the training algorithms (e.g., SGD) of DNNs converge to a solution that is a stationary point of the convex reformulation, as shown in Section B of the Appendix. This excludes bad local minimum solutions for DNN optimization. Moreover, the convexity and unique solution path imply that CNNs are much simpler if we view them in the feature distribution space. All these demonstrate the value of studying DNNs in feature distribution space.

**Notations.** For a positive integer  $n$ , we let  $[n]$  to be the set  $\{1, 2, \dots, n\}$ . We denote  $\|x\|_1$  and  $\|x\|$  to be the  $\ell_1$  and  $\ell_2$  norm of a vector  $x$  in  $\mathbb{R}^d$ . For any  $k \in [d]$ , we let  $x_k$  be the value of the  $k$ -th dimension of  $x$  and denote  $vec(w)$  to be the operator for reshaping a matrix or tensor  $w$  into a vector.

## 2 Related Work

### 2.1 Characterization of DNNs' Landscape

One main purpose of the studies on landscape characterization is to explain why DNNs with massive parameters can be trained efficiently in practice. They mainly explore the following subjects:

**Geometry of loss surface** The training of DNNs depends highly on the network architecture, optimization techniques (e.g., batch normalization (BN)) and some other considerations. Some researchers try to study the impacts of these factors on the geometry of the loss surface. They [8, 21] show that the loss landscapes quickly transit from being nearly convex to being highly chaotic when the network becomes deeper, and residual connections promote surface smoothness and prevent

the explosion of non-convexity, which verifies that skip connection is essential for extremely deep networks. Moreover, [28] demonstrates that the effectiveness of BN comes from its effects on the smoothness of the landscape instead of controlling *covariate shift*.

**Properties of local minima** These studies attempt to understand the phenomenon observed in practice that local minima found by training algorithms are nearly always good. They show that in idealized settings, the local minima of DNNs have similar loss values [12, 11]. To be precise, [18] proved that linear networks have no sub-optimal local minima. [30] shows that for deep residual network with a single output unit, the objective values of all local minima are no higher than what can be obtained with a linear predictor. However, these existing studies are restricted to strong assumptions of model simplifications, such as linear activation. For nonlinear DNNs in practice, theoretical properties of local minima are still unknown.

**Mode Connectivity** The phenomenon of mode connectivity implies that the optima of DNNs may have special and simple structures. Some efforts have been made to understand it theoretically. [26] shows that for overparameterized DNNs with piece-wise linear activations, the sublevel sets of their loss functions are connected and bounded. For nonlinear DNNs, [20, 27, 31] prove the existence of these low-cost paths under the assumptions such as the DNNs are dropout stable or noise stable.

Despite the above breakthroughs on characterizing the landscapes of DNNs, many empirical phenomena of DNNs are still poorly understood. Some studies [32, 19] even had inconsistent conclusions, e.g., whether randomly initialized DNNs with the same architecture learn the same representation.

## 2.2 Overparameterized Deep Learning Theory

The theoretical work about overparameterized NN, motivated by its great empirical success, can be roughly divided into two categories, i.e. mean field limit and neural tangent kernel (NTK) limit, based on whether the network parameters change a lot during training. The NTK limit [17, 10, 14, 22, 13, 2, 3, 6, 7] considers a tiny neighborhood of the initialization, and with an appropriate scaling that approaches infinity, it can be shown that the global minimum is achieved within the tiny neighborhood (called NTK regime) that becomes infinitesimal in the limit. Therefore the neural network can be linearized around the initialization, and the resulting formulation becomes convexity. However, it is observed that NNs within the NTK region does not perform well compared to fully trained NNs using standard methods, which always go out of the NTK regime. Therefore NTK cannot be used to study the standard NN training process and the associated landscape characterization, as we are interested in doing in this paper. To overcome this discrepancy between theory and practice, the mean field limit [24, 9, 25] has been proposed. This is also the approach most related to this paper, because we also consider the standard training process that goes out of the NTK regime. The original mean field framework works with distributions over NN parameters, which is difficult to extend to deep networks. This paper considers the convex reformulation idea in [4, 5], where overparameterized NNs are parameterized using feature distributions of the hidden neurons. We investigate the empirical justifications and their relationship to the theory of convex reformulation.

## 3 Basics

In this section, we give the detailed formulation of standard CNN, and hereafter we refer to it as discrete CNN in contrast to our continuous CNN in Section 5.1. We notice that fully connected layer can be viewed as a convolutional layer by treating each hidden node as a special channel valued in  $\mathbb{R}^{1 \times 1}$ . Therefore, we can write the fully connected and convolutional layers into a unified form to simplify the formulas. Below we define a  $(L + 1)$ -layer CNN mapping an input into a real valued vector in  $\mathbb{R}^K$ . The number of hidden nodes/channels in each hidden layer  $\ell$  is denoted to be  $m^{(\ell)}$ .

We denote all the trainable parameters in the network as  $\theta = (w^{(1)}, \dots, w^{(L)}, u)$ , which will be specified later. First, given an input  $x \in \mathbb{R}^{W^{(0)} \times H^{(0)} \times C}$ , let  $m^{(0)} = C$  and define the nodes in the input later as  $\hat{f}_j^{(0)}(\theta; x) = x_{:, :, j}$  with  $j \in [m^{(0)}]$ . Then, for the hidden layer  $\ell \in [L]$ , define the output of its  $j$ -th hidden node/channel  $\hat{f}_j^{(\ell)}(\theta; x) \in \mathbb{R}^{W^{(\ell)} \times H^{(\ell)}}$  with  $j \in [m^{(\ell)}]$  as

$$\hat{f}_j^{(\ell)}(\theta; x) = h^{(\ell)}\left(\hat{g}_j^{(\ell)}(\theta; x)\right) \text{ with } \hat{g}_j^{(\ell)}(\theta; x) = \frac{1}{m^{(\ell-1)}} \sum_{k=1}^{m^{(\ell-1)}} \hat{f}_k^{(\ell-1)}(\theta; x) * w_{j,k}^{(\ell)},$$

where  $w_j^{(\ell)} = [w_{j,1}^{(\ell)}, \dots, w_{j,m^{(\ell-1)}}^{(\ell)}] \in \mathbb{R}^{a^{(\ell)} \times b^{(\ell)} \times m^{(\ell-1)}}$  is the  $j$ -th kernel,  $h^{(\ell)} = \mathcal{P}^{(\ell)} \circ \psi^{(\ell)}$  with  $\psi^{(\ell)}$  being the activation function and  $\mathcal{P}^{(\ell)}$  being the pooling operator if layer  $\ell$  is followed by a pooling layer otherwise  $\mathcal{P}^{(\ell)}$  is an identity mapping. For the top layer, we denote  $u_j$  to be a vector valued in  $\mathbb{R}^K$ , then the output  $\hat{f}(\theta; x) \in \mathbb{R}^K$  can be defined as  $\hat{f}(\theta; x) = \frac{1}{m^{(L)}} \sum_{j=1}^{m^{(L)}} u_j \hat{f}_j^{(L)}(\theta; x)$ . The goal of training a CNN is to minimize the following objective function:

$$\hat{Q}(w, u) = J(\hat{f}) + \hat{R}(w, u), \text{ with } \hat{R}(w, u) = \sum_{\ell=1}^L \lambda^{(\ell)} \hat{R}^{(\ell)}(w^{(\ell)}) + \lambda^{(u)} \hat{R}^{(u)}(u), \quad (1)$$

where  $J(\hat{f}) = \mathbb{E}_{x,y} \phi(\hat{f}(x), y)$  with  $\phi(\cdot, \cdot)$  being the loss function and  $\hat{R}(w, u)$  is the regularizer with  $\lambda^{(\ell)}$  and  $\lambda^{(u)}$  being its non-negative hyper-parameters. In this paper, we focus on the following  $\ell_{1,2}$  regularier proposed in [4] due to its ability in learning efficient features:

$$\hat{R}^{(\ell)}(w^{(\ell)}) = \frac{1}{m^{(\ell-1)}} \sum_{k=1}^{m^{(\ell-1)}} r_2 \left( \frac{1}{m^{(\ell)}} \sum_{j=1}^{m^{(\ell)}} r_1 \left( w_{j,k}^{(\ell)} \right) \right), \quad \hat{R}^{(u)}(u) = \frac{1}{m^{(L)}} \sum_{j=1}^{m^{(L)}} r^{(u)}(u_j),$$

where  $r_1(w) = \|vec(w)\|_1$ ,  $r_2(w) = w^2$  and  $r^{(u)}(u) = \|u\|_2^2$ .

## 4 Neural Network Grafting

In this section, we introduce a new method called *neural network grafting* (NNG) to check whether two different CNNs learn similar feature representations at each layer. The intuition is that if two networks  $\theta_1$  and  $\theta_2$  learn similar feature representations at layer  $\ell$ , then the features of  $\theta_1$  at layer  $\ell$  can be used in  $\theta_2$  without significant error increasing, that is, the first  $\ell$  layers of  $\theta_1$  with the trained parameters in them can be grafted onto the last  $L - \ell$  layers of  $\theta_2$  by only training the parameters at the joint. As shown in Fig.1(a), NNG is conducted by first copying parameters from  $\theta_1$  and  $\theta_2$  to construct a new network  $\tilde{\theta}_{(1,2)} = (\theta_1^{(1)}, \dots, \theta_1^{(\ell)}, \tilde{\theta}_{(1,2)}^{(\ell+1)}, \theta_2^{(\ell+2)}, \dots, \theta_2^{(L)}, u_2)$  and then training the parameters  $\tilde{\theta}_{(1,2)}^{(\ell+1)}$  to align the neurons at the joint by minimizing the following feature matching loss:

$$\min_{\tilde{\theta}_{(1,2)}^{(\ell+1)}} \frac{1}{N} \sum_{i=1}^N \sum_{k=1}^{m^{(\ell+1)}} \|\hat{g}_k^{(\ell+1)}(\tilde{\theta}_{(1,2)}; x_i) - \hat{g}_k^{(\ell+1)}(\theta_2; x_i)\|_2^2. \quad (2)$$

Detailed steps are given in Alg.1 in Appendix. We could imagine that if the representation at layer  $\ell$  in  $\theta_1$  is similar to that of  $\theta_2$ , then the loss in (2) would be low after grafting, and the final validation error of  $\tilde{\theta}_{(1,2)}$  will be similar to that of  $\theta_2$  and otherwise it will be significantly higher than  $\theta_2$ .

**Remark 1.** In our grafting process, we minimize the feature difference at layer  $\ell + 1$  instead of minimize the final loss to compare the feature representations more directly.

Notice that both our NNG and previous metrics (e.g., [23], [19] and [32]) can address the case when two feature representations are quite different but can be matched after a linear transformation. However, our NNG can address at least another important case that existing metrics cannot deal with. To be precise, if two feature representations are quite different but the difference is not important for subsequent layers, they would be regarded to be different by previous metrics while they are essentially similar. Such difference could be alleviated and even eliminated completely by, for example, the small weight and truncation of ReLU in subsequent layers. An example is shown in Fig. 1(b), where green and yellow curves represent feature representations of network  $\theta_2$  and  $\tilde{\theta}_{(1,2)}$  respectively. Detailed quantitative evaluation for it is presented in Fig. 2(c).

## 5 Landscape Characterization

In this section, we present our landscape characterization method. We first reformulate an overparameterized CNN as an approximation to a continuous CNN, which is obtained by letting the number of channels/hidden nodes in each hidden layer go to infinity (Section 5.1). Then we reformulate it with respect to the feature distributions to obtain a simpler landscape characterization (Section 5.2).

## 5.1 Continuous CNN

Following the mean-field limit of overparameterized NN, below we give the definition of continuous CNN by letting the number of the channels/hidden nodes in each layer of a discrete CNN go to infinity. Firstly, for the input layer we denote  $\mathcal{Z}^{(0)} = [C]$  to be its channel space corresponding to the  $C$  channels of the input  $x$ . We let  $\rho^{(0)}$  be a probability measure on  $\mathcal{Z}^{(0)}$  and unless otherwise specified, in this paper, we fix  $\rho^{(0)}$  to be a uniform distribution on  $\mathcal{Z}^{(0)}$ . For each  $z^{(0)} \in \mathcal{Z}^{(0)}$ , we let

$$f^{(0)}(\rho, z^{(0)}; x) = x_{::, z^{(0)}}.$$

For layer  $\ell \in [L]$ , let  $\mathcal{Z}^{(\ell)}$  be the space of the hidden nodes/channels in layer  $\ell$  equipped with probability measure  $\rho^{(\ell)}$ . Denote  $w(z^\ell, z^{(\ell-1)}) \in \mathbb{R}^{a^{(\ell)} \times b^{(\ell)}}$  to be the weight/kernel connecting the nodes/channels  $z^{(\ell-1)} \in \mathcal{Z}^{(\ell-1)}$  and  $z^\ell \in \mathcal{Z}^{(\ell)}$ , the output of hidden nodes/channels can be defined as

$$f^{(\ell)}(\rho, z^{(\ell)}; x) = h^{(\ell)} \left( g^{(\ell)}(\rho, z^{(\ell)}; x) \right),$$

$$\text{where } z^{(\ell)} \in \mathcal{Z}^{(\ell)} \text{ and } g^{(\ell)}(\rho, z^{(\ell)}; x) = \int f^{(\ell-1)}(\rho, z^{(\ell-1)}; x) * w(z^\ell, z^{(\ell-1)}) d\rho^{(\ell-1)}(z^{(\ell-1)}).$$

At last, by denoting  $u(z^{(L)}) \in \mathbb{R}^K$  to be the weight connecting the node  $z^{(L)}$  and the final output, then the final (fully connected) output layer is given by

$$f(\rho, u; x) = \int u(z^{(L)}) f^{(L)}(\rho, z^{(L)}; x) d\rho^{(L)}(z^{(L)}).$$

The objective function then takes form of

$$Q(\rho, u, w) = J(f) + R(\rho, u, w) \quad (3)$$

$$\text{where } R(\rho, u, w) = \sum_{\ell=1}^L \lambda^{(\ell)} R^{(\ell)}(w, \rho, w) + \lambda^{(u)} R^{(u)}(\rho, u, w)$$

$$\text{with } R^{(\ell)}(\rho, w) = \int r_2 \left( \int r_1 \left( w(z^\ell, z^{(\ell-1)}) \right) d\rho^{(\ell)}(z^{(\ell)}) \right) d\rho^{(\ell-1)}(z^{(\ell-1)}),$$

$$R^{(u)}(\rho, u) = \int r^{(u)} \left( u(z^{(L)}) \right) d\rho^{(L)}(z^{(L)}).$$

**Discussion:** Discrete CNN can be constructed from a continuous CNN by sampling  $m^{(\ell)}$  hidden nodes/channels  $\{z_1^{(\ell)}, \dots, z_{m^{(\ell)}}^{(\ell)}\}$  for each layer  $\ell$  according to the probability measure  $\rho^{(\ell)}$  and letting the parameter connecting  $z_i^{(\ell)}$  and  $z_j^{(\ell-1)}$  be  $w(z_i^{(\ell)}, z_j^{(\ell-1)})$  for all  $i \in [m^{(\ell)}]$  and  $j \in [m^{(\ell-1)}]$ . From [4] we know that when  $m^{(\ell)} \rightarrow \infty$  for all  $\ell \in [L]$ , the final output of discrete CNN converges to that of the continuous one. Therefore, discrete CNN is an approximation to a continuous CNN.

## 5.2 Reformulate Continuous CNNs

The uniqueness of the solution path, i.e., the unique feature distribution evolution path, discovered by our technique NNG (Sections 4 and 6.1) implies that DNNs could be much simpler if we view them with respect to feature distributions. Therefore, we reformulate continuous CNN with respect to the distribution of pre-activation of neurons, i.e., feature distribution, to eliminate the redundancy caused by weights and obtain a simpler loss landscape characterization, which is inspired from the emerging techniques [4, 5] for reformulating fully connected DNNs. First, we define

$$\mathcal{V}^{(0)} = \{v^{(0)} : v^{(0)} = [x_{::, i}^1, \dots, x_{::, i}^N], i \in [C]\}, \text{ and } p^{(0)}(v^{(0)} = [x_{::, i}^1, \dots, x_{::, i}^N]) = 1/C, i \in [C].$$

For  $\ell \in [L]$ , we denote  $v^{(\ell)}$  to be the pre-activation of neuron  $z^{(\ell)}$  at  $N$  training samples, i.e.,  $v^{(\ell)} = [g^{(\ell)}(\rho, z^{(\ell)}; x_1), \dots, g^{(\ell)}(\rho, z^{(\ell)}; x_N)] \in \mathbb{R}^{W^{(\ell)} \times H^{(\ell)} \times N}$  and let  $\mathcal{V}^{(\ell)}$  be the space of  $v^{(\ell)}$ , i.e.,  $\mathcal{V}^{(\ell)} = \{v^{(\ell)} : z^{(\ell)} \in \mathcal{Z}^{(\ell)}\}$ . We denote  $p^{(\ell)}(v^{(\ell)})$  to be the probability density function of  $v^{(\ell)}$ . For any  $v^{(\ell-1)}$  and  $v^{(\ell)}$ , we let  $w(v^{(\ell)}, v^{(\ell-1)}) \in \mathbb{R}^{a^{(\ell)} \times b^{(\ell)}}$  be the weight connecting them. Problem (3) can then be reformulated as

$$\min_{w, p, u} \frac{1}{N} \sum_{i=1}^N \phi(f(x_i), y_i) + R(w, p, u) \quad (4)$$

$$\begin{aligned}
& \text{s.t. 1) } \sum_{v^{(0)} \in \mathcal{V}^{(0)}} v_i^{(0)} * w(v^{(1)}, v^{(0)}) p^{(1)}(v^{(1)}) p^{(0)}(v^{(0)}) = p^{(1)}(v^{(1)}) v_i^{(1)}, i \in [N]; \\
& 2) \int h^{(\ell-1)}(v_i^{(\ell-1)}) * w(v^{(\ell)}, v^{(\ell-1)}) p^{(\ell)}(v^{(\ell)}) p^{(\ell-1)}(v^{(\ell-1)}) dv^{(\ell-1)} = v_i^{(\ell)} p^{(\ell)}(v^{(\ell)}), \ell \geq 2, i \in [N]; \\
& 3) \int p^{(\ell)}(v^{(\ell)}) dv^{(\ell)} = 1 \text{ and } p^{(\ell)}(v^{(\ell)}) \geq 0,
\end{aligned}$$

193 where  $f(x_i)$  and  $R(w, p, u)$  are defined as

$$\begin{aligned}
f(x_i) &= \int h^{(L)}(v_i^{(L)}) u(v^{(L)}) p^{(L)}(v^{(L)}) dv^{(L)}, \quad R(w, p, u) = \sum_{\ell=1}^L \lambda^{(\ell)} R^{(\ell)}(w, p) + \lambda^{(u)} R^{(u)}(u, p), \\
\text{with } R^{(1)}(w, p) &= \sum_{v^{(0)} \in \mathcal{V}^{(0)}} r_2 \left( \int r_1 \left( w(v^{(1)}, v^{(0)}) p^{(0)}(v^{(0)}) p^{(1)}(v^{(1)}) \right) dv^{(1)} \right) / p^{(0)}(v^{(0)}), \\
R^{(\ell)}(w, p) &= \int r_2 \left( \int r_1 \left( w(v^{(\ell)}, v^{(\ell-1)}) p^{(\ell-1)}(v^{(\ell-1)}) p^{(\ell)}(v^{(\ell)}) \right) dv^{(\ell)} \right) / p^{(\ell-1)}(v^{(\ell-1)}) dv^{(\ell-1)}, \\
\ell \geq 2 \text{ and } R^{(u)}(u, p) &= \int r^{(u)} \left( u(v^{(L)}) p^{(L)}(v^{(L)}) \right) / p^{(L)}(v^{(L)}) dv^{(L)}.
\end{aligned}$$

194 The weights  $w$  in problem (4) are determined by  $p^{(\ell)}$  via a series of constraints in 1) and 2), hence  
195 the network can be regarded as being parameterized by  $p^{(\ell)}$  without  $w$ . Therefore, the redundancy  
196 from  $w$  in networks parameterized via  $w$  is eliminated. One issue with Problem (4) is that it is still  
197 non-convex due to its non-convex constraints. Fortunately, we find that by reparameterizing the  
198 above colored items according to Eqn.(5), the constraints above become either convex or linear, and  
199 then problem (4) can be rewritten into a simpler convex form. We summarized the main point in the  
200 following theorem and details are presented in Appendix A.

201 **Theorem 1.** *If we change the variables  $u$  and  $w$  as follows:*

$$\begin{cases} \text{(i)} \tilde{w}(v^{(\ell)}, v^{(\ell-1)}) = w(v^{(\ell)}, v^{(\ell-1)}) p^{(\ell)}(v^{(\ell)}) p^{(\ell-1)}(v^{(\ell-1)}), \ell \in [L]; \\ \text{(ii)} \tilde{u}(v^{(L)}) = u(v^{(L)}) p^{(L)}(v^{(L)}); \end{cases} \quad (5)$$

202 *then problem (4) becomes a convex optimization problem with respect to  $\tilde{w}, p$  and  $\tilde{u}$ .*

203 **Discussion:** To the best of our knowledge, we give the first global convex formulation in Theorem  
204 1 for continuous CNNs, i.e., a much simpler loss landscape characterization than existing methods.  
205 Although we find this convexity in feature distribution space instead of trainable parameter space,  
206 this would not overshadow its significant value. For one thing, as empirically shown in Section  
207 6.1, the solution paths of DNNs during training, if we view them in the feature distribution space,  
208 are unique although they seem chaotic and quite different in the parameter space, which indicates  
209 that DNNs could be more understandable and simpler if we analyze them from feature distribution  
210 space. For another, the unique solution path implies that the training algorithms (e.g., SGD) could  
211 essentially work on the feature distribution space instead of the parameter space, which together with  
212 the convexity naturally explain why one usually does not observe bad local minima in practice. In  
213 fact, it can be shown that under suitable conditions, the training algorithms (e.g., SGD) of DNNs  
214 converge to a solution that is a stationary point of the convex reformulation, as shown in Section B of  
215 the appendix. All these demonstrate the value of studying DNNs in feature distribution space.

## 216 6 Experiments

217 We start from using our proposed technique NNG to show that two overparameterized CNNs with  
218 same architecture and initialization method, though have different initializations at the beginning  
219 of training, learn the unique solution path during the whole training process, which could be ex-  
220 plained by our theory in Section 5.1. Then we give some empirical evidences for the convexity of  
221 overparameterized CNN by showing the uniqueness of its optimal solution and visualizing its the  
222 loss landscape in Section 6.2. All our empirical findings are consistent across a range of architectures  
223 and datasets, we only present the results on CIFAR-10 with VGG-16 below and postpone the results  
224 on other architectures and datasets to appendix. In appendix, we also provide results to show that

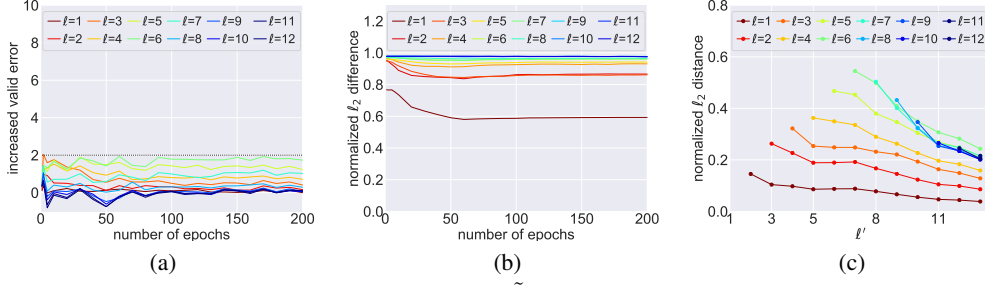

Figure 2: (a) The increased validation error of  $\tilde{\theta}_{(1,2)}$  compared with  $\theta_2$  when grafted at layer  $\ell$  and (b) the normalized  $\ell_2$  distance between the weights  $\theta_1^{(\ell)}$  and  $\theta_2^{(\ell)}$ . These values are plotted at different training stages. (c) The mean  $\ell_2$  distance (Eqn. (6)) between feature function  $f^{(\ell')}(\theta_2; x)$  and  $f^{(\ell')}(\tilde{\theta}_{(1,2)}; x)$  for each  $\ell' > \ell$ , where  $x$  enumerates the training data.  $\tilde{\theta}_{(1,2)}$  is grafted at layer  $\ell$ .

VGG is overparameterized enough, i.e., a good approximation for the corresponding continuous VGG, demonstrating the applicability of our results. We use  $\ell_{1,2}$  regularizer, and save intermediate checkpoints of NN parameters at time-step  $t \in \{1, 2, 5, 8\} \cup \{10k : k \in \mathbb{N}^+\}$  in the entire section.

## 6.1 Uniqueness of Solution Path during Training

We first demonstrate that the solution paths are the same over the whole training process if we view them in terms of feature distributions, although they seem chaotic and quite different if viewed from the trainable parameters. Firstly, two VGG-16 are trained from two different initializations using the same initializer. The same initializer is used to guarantee the nets are initialized with almost the same feature distribution. For each checkpoint pair of  $\theta_1$  and  $\theta_2$  saved at the same time-step, we graft  $\theta_1$  to  $\theta_2$  at each layer and plot the increased validation error of  $\tilde{\theta}_{(1,2)}$ . For comparison, we also calculate the distance between the parameters in the checkpoints of  $\theta_1$  and  $\theta_2$ . The details for calculating the distance is in Section D of appendix. The results are shown in Fig. 2.

The low increased validation errors of  $\tilde{\theta}_{(1,2)}$  at all time-steps in Fig. 2(a) indicate that the feature distributions learned by  $\theta_1$  and  $\theta_2$  at different layers are equal to each other along the 'training trajectory'. At the same time, the normalized  $\ell_2$  distances between  $\theta_1$  and  $\theta_2$  in Fig. 2(b) show that the RMSE between two weight matrices after alignment and unit-variance normalization is above 0.6 for all layers and time-steps, which implies that these two weight matrices are not equivalent under row/column exchange operation. A natural explanation is that the training algorithms (e.g., SGD) essentially work on feature distribution space instead of parameter space, and the evolution of the feature distributions during training follows some differential equation. Since the initializer gives almost the same initializations to the differential equation, the solution paths would be very similar during the whole process of solving this equation, i.e., the training process.

Compared with existing metrics which directly compare the feature representations at each layer, our NNG technique could partly alleviate the effect of redundancy. A direct empirical investigation is shown in Fig. 2 (c), where the mean  $\ell_2$  distance between feature functions of nets  $\tilde{\theta}_{(1,2)}$  and  $\theta_2$  at layer  $\ell'$  is defined as:

$$\frac{1}{m^{(\ell')}} \sum_{k=1}^{m^{(\ell')}} \frac{1}{\sqrt{s_k}} \sqrt{\sum_{i=1}^n \frac{1}{n} \|\hat{f}_k^{(\ell')}(\tilde{\theta}_{(1,2)}; x_i) - \hat{f}_k^{(\ell')}(\theta_2; x_i)\|_2^2}, \quad (6)$$

and  $s_j = \sum_{i=1}^{W^{(\ell')}} \sum_{j=1}^{H^{(\ell')}} \hat{\text{var}}[(\hat{f}_k^{(\ell')}(\theta_2; X))_{i,j}]$  while  $\hat{\text{var}}$  stands for the estimated variance. For example, we could see that if we graft the sixth layer of  $\theta_1$  to seventh layer of  $\theta_2$  (line denoted as  $\ell = 6$ ), the  $\ell_2$  distance between feature functions of  $\tilde{\theta}_{(1,2)}$  and that of  $\theta_2$  in layer 7 is very large. But this error significantly decreases as it propagates to the output layer. Such phenomenon indicates that a large fraction of error introduced by grafting at layer  $\ell$  is caused by redundancy, which could be largely cancelled out by, for example, the small weight and the truncation of activation function in each layer  $\ell' > \ell$ . Moreover, we also show that successful graft is non-trivial and provide more interesting empirical findings about NNG in Appendix.

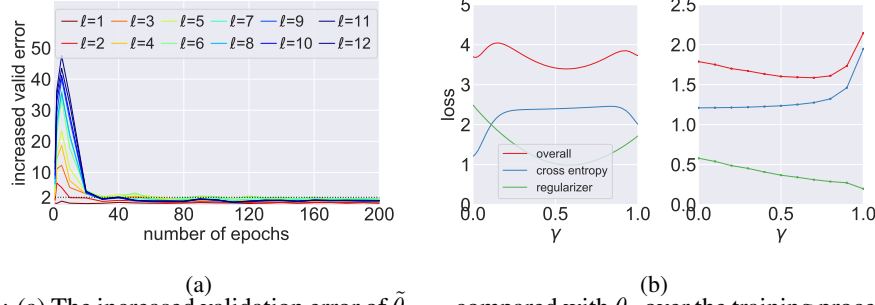

Figure 3: (a) The increased validation error of  $\tilde{\theta}_{(1,2)}$  compared with  $\theta_2$  over the training process, where  $\theta_1$  and  $\theta_2$  are trained with different initialization methods. (b) The overall/cross entropy/regularizer loss of  $\hat{\theta}_\gamma = \gamma\theta_1 + (1 - \gamma)\theta_2$  (left),  $\bar{\theta}_\gamma$  (right).

## 6.2 The Evidence of Convexity

We further design some experiments to support our claim that the landscape of overparameterized CNN is convex with respect to the distribution of feature functions at each layer. To be specific, we consider two network  $\theta_1$  and  $\theta_2$  with different initialization methods. In this section, we use two types of variance scaling initializer [15] with uniform (*he\_uniform*) and normal (*he\_normal*) distribution for weights in  $\theta_1$  and  $\theta_2$  respectively. Because  $\theta_1$  and  $\theta_2$  use different initialization methods, their initial feature distribution at each layer is quite different, the training journey of  $\theta_1$  and  $\theta_2$  then follow two different paths. We are interested in the following two questions: (1) Is the end points of the two paths are the same? (2) From the perspective of feature distribution, does linear interpolation between two points in these two paths lead to a convex loss curve? It will strongly support our claim of convexity of landscape if the answers to these two questions are 'yes'.

**Uniqueness of Optimal Solution** To answer the first question, we make use of our NNG technique again to check whether two intermediate checkpoints of  $\theta_1$  and  $\theta_2$  with same time-step have similar feature distributions. To be specific, for saved checkpoints, we graft each layer  $\ell$  of  $\theta_1$  onto layer  $\ell + 1$  of  $\theta_2$  and the results are in Fig. 3(a). We can see that the increased valid error of  $\tilde{\theta}_{(1,2)}$  grafted at each layer is very high in the beginning and decreases quickly as training process goes on, implying that the feature distributions learned by  $\theta_1$  and  $\theta_2$  start from different points and converge to a same point.

**Loss Landscape Visualization** We next consider to visualize the loss curve of linear interpolation between two points in feature distribution view. Given two NNs  $\theta_1$  and  $\theta_2$  with feature distributions denotes as  $p_1$  and  $p_2$ , the intuitive idea of constructing a NN  $\bar{\theta}_\gamma$ , which has feature distribution  $\gamma p_1 + (1 - \gamma)p_2$ , is to make sure the pre-activation set of  $\bar{\theta}_\gamma$  is close to the mixture of that of  $\theta_1$  and  $\theta_2$  with ratio  $\gamma/(1 - \gamma)$ , where the pre-activation set of  $\theta$  on training set is defined as

$$\hat{\mathcal{V}}_\theta^{(\ell)} = \left\{ v_j^{(\ell)} = [\hat{g}_j^\ell(\theta; x_1), \dots, \hat{g}_j^\ell(\theta; x_N)] : j \in [m^{(\ell)}] \right\}.$$

An optimization-based algorithm is designed to construct  $\bar{\theta}_\gamma$ , i.e., Alg.2 in Appendix. We let  $\theta_1$  and  $\theta_2$  to be VGG-16 trained after 2 epochs using *he\_uniform* and *he\_normal* initializers, attaining 19% and 57% accuracy respectively, and plot the loss of  $\bar{\theta}_\gamma$  when  $\gamma$  varies. The result is shown in Fig. 3 (b). Compared with the non-convex loss curve of linear interpolation in weight space (left), the linear interpolation in feature distribution space (right) leads to a convex loss curve.

## 7 Conclusions

In this work, we presented an experimental technique NNG, which can be used to determine whether two NNs learn similar features. Extensive experimental results with NNG suggest that overparameterized CNN learns a fixed trajectory in feature distributions. We then proposed a framework to reformulate the loss w.r.t. the feature distribution at each layer, to explain the phenomenon. This reformulation explains convex loss landscape and fixed feature distribution trajectory for SGD. Because of their better theoretical and empirical properties, we argue that NN loss landscapes should be characterized with respect to the feature distribution space rather than the parameter space.

## 294 **8 Broader Impact**

295 The authors feel that the broader impact seems not applicable to this work. The reason is that this is a  
296 research paper, which provides new insights to help people better understand deep neural networks  
297 and can motivate more efficient training algorithms in the future. But it is hard to say who may benefit  
298 and who may be put at disadvantage from this research.

## References

- [1] M. Abadi, A. Agarwal, P. Barham, E. Brevdo, Z. Chen, C. Citro, G. S. Corrado, A. Davis, J. Dean, M. Devin, S. Ghemawat, I. Goodfellow, A. Harp, G. Irving, M. Isard, Y. Jia, R. Jozefowicz, L. Kaiser, M. Kudlur, J. Levenberg, D. Mané, R. Monga, S. Moore, D. Murray, C. Olah, M. Schuster, J. Shlens, B. Steiner, I. Sutskever, K. Talwar, P. Tucker, V. Vanhoucke, V. Vasudevan, F. Viégas, O. Vinyals, P. Warden, M. Wattenberg, M. Wicke, Y. Yu, and X. Zheng. TensorFlow: Large-scale machine learning on heterogeneous systems, 2015. Software available from tensorflow.org.
- [2] Z. Allen-Zhu, Y. Li, and Y. Liang. Learning and generalization in overparameterized neural networks, going beyond two layers. *arXiv preprint arXiv:1811.04918*, 2018.
- [3] Z. Allen-Zhu, Y. Li, and Z. Song. A convergence theory for deep learning via over-parameterization. In *International Conference on Machine Learning*, 2019.
- [4] anonymous. Convex formulation of overparameterized deep neural networks. *arXiv*, 2019.
- [5] anonymous. Modeling from features: a mean-field framework for over-parameterized deep neural networks. *In progress*, 2020.
- [6] S. Arora, S. S. Du, W. Hu, Z. Li, R. Salakhutdinov, and R. Wang. On exact computation with an infinitely wide neural net. *arXiv preprint arXiv:1904.11955*, 2019.
- [7] S. Arora, S. S. Du, W. Hu, Z. Li, and R. Wang. Fine-grained analysis of optimization and generalization for overparameterized two-layer neural networks. In *International Conference on Machine Learning*, 2019.
- [8] R. Balestriero, R. Cosentino, B. Aazhang, and R. Baraniuk. The geometry of deep networks: Power diagram subdivision. In *Advances in Neural Information Processing Systems*, pages 15806–15815, 2019.
- [9] L. Chizat and F. Bach. On the global convergence of gradient descent for over-parameterized models using optimal transport. In *Advances in neural information processing systems*, pages 3036–3046, 2018.
- [10] L. Chizat, E. Oyallon, and F. Bach. On lazy training in differentiable programming. In *Advances in Neural Information Processing Systems*, pages 2933–2943, 2019.
- [11] A. Choromanska, M. Henaff, M. Mathieu, G. B. Arous, and Y. LeCun. The loss surfaces of multilayer networks. In *Artificial intelligence and statistics*, pages 192–204, 2015.
- [12] Y. N. Dauphin, R. Pascanu, C. Gulcehre, K. Cho, S. Ganguli, and Y. Bengio. Identifying and attacking the saddle point problem in high-dimensional non-convex optimization. In *Advances in neural information processing systems*, pages 2933–2941, 2014.
- [13] S. S. Du, J. D. Lee, H. Li, L. Wang, and X. Zhai. Gradient descent finds global minima of deep neural networks. In *International Conference on Machine Learning*, 2019.
- [14] S. S. Du, X. Zhai, B. Póczos, and A. Singh. Gradient descent provably optimizes over-parameterized neural networks. In *International Conference on Learning Representation*, 2019.
- [15] K. He, X. Zhang, S. Ren, and J. Sun. Delving deep into rectifiers: Surpassing human-level performance on imagenet classification. In *2015 IEEE International Conference on Computer Vision (ICCV)*, 2016.
- [16] G. Huang, Y. Li, G. Pleiss, Z. Liu, J. E. Hopcroft, and K. Q. Weinberger. Snapshot ensembles: Train 1, get m for free. *International Conference on Learning Representations*, 2017.
- [17] A. Jacot, F. Gabriel, and C. Hongler. Neural tangent kernel: Convergence and generalization in neural networks. In *Advances in neural information processing systems*, pages 8571–8580, 2018.
- [18] K. Kawaguchi. Deep learning without poor local minima. In *Advances in neural information processing systems*, pages 586–594, 2016.
- [19] S. Kornblith, M. Norouzi, H. Lee, and G. Hinton. Similarity of neural network representations revisited. *arXiv preprint arXiv:1905.00414*, 2019.
- [20] R. Kuditipudi, X. Wang, H. Lee, Y. Zhang, Z. Li, W. Hu, R. Ge, and S. Arora. Explaining landscape connectivity of low-cost solutions for multilayer nets. In *Advances in Neural Information Processing Systems*, pages 14574–14583, 2019.
- [21] H. Li, Z. Xu, G. Taylor, C. Studer, and T. Goldstein. Visualizing the loss landscape of neural nets. In *Advances in Neural Information Processing Systems*, pages 6389–6399, 2018.
- [22] Y. Li and Y. Liang. Learning overparameterized neural networks via stochastic gradient descent on structured data. In *Advances in Neural Information Processing Systems*, 2018.
- [23] Y. Li, J. Yosinski, J. Clune, H. Lipson, and J. E. Hopcroft. Convergent learning: Do different neural networks learn the same representations? In *FE@ NIPS*, pages 196–212, 2015.
- [24] S. Mei, A. Montanari, and P.-M. Nguyen. A mean field view of the landscape of two-layer neural networks. *Proceedings of the National Academy of Sciences*, 115(33):E7665–E7671, 2018.

- 353 [25] P.-M. Nguyen. Mean field limit of the learning dynamics of multilayer neural networks. *arXiv preprint*  
 354 *arXiv:1902.02880*, 2019.
- 355 [26] Q. Nguyen. On connected sublevel sets in deep learning. *arXiv preprint arXiv:1901.07417*, 2019.
- 356 [27] Q. Nguyen, M. C. Mukkamala, and M. Hein. On the loss landscape of a class of deep neural networks  
 357 with no bad local valleys. *arXiv preprint arXiv:1809.10749*, 2018.
- 358 [28] S. Santurkar, D. Tsipras, A. Ilyas, and A. Madry. How does batch normalization help optimization? In  
 359 *Advances in Neural Information Processing Systems*, pages 2483–2493, 2018.
- 360 [29] F. Schilling. The effect of batch normalization on deep convolutional neural networks, 2016.
- 361 [30] O. Shamir. Are resnets provably better than linear predictors? In *Advances in neural information processing*  
 362 *systems*, pages 507–516, 2018.
- 363 [31] L. Venturi, A. S. Bandeira, and J. Bruna. Spurious valleys in two-layer neural network optimization  
 364 landscapes. *arXiv preprint arXiv:1802.06384*, 2018.
- 365 [32] L. Wang, L. Hu, J. Gu, Z. Hu, Y. Wu, K. He, and J. Hopcroft. Towards understanding learning representa-  
 366 tions: To what extent do different neural networks learn the same representation. In *Advances in Neural*  
 367 *Information Processing Systems*, pages 9584–9593, 2018.

## Supplemental Material: How to Characterize The Landscape of Overparameterized Convolutional Neural Networks

This appendix can be divided into four parts. To be precise,

1. Section A gives the detailed proof for Theorem 1;
2. Section B gives high-level proof of the claim that SGD will converge to the stationary point of our proposed convex formulation.
3. Section C shows omitted algorithms and calculation methods in the paper, including (1) algorithm of *neural network grafting* (2) algorithm to construct NN with mixture features of two networks.
4. Section D presents experimental configuration of this paper;
5. Section E provides more experimental evidences of the uniqueness of solution path, feature redundancy and the uniqueness of optimal solution.
6. Section F provides evidence to show that standard VGG is overparameterized enough. To be specific, we show that the feature distribution learned by standard VGG, have no difference though the *entire* training process with respect to the one learned by a larger VGG, which has same architecture except has twice number of channels/hidden nodes at each layer.
7. Section G presents some additional interesting results found by our proposed NNG in comparing the feature distributions of NN at different cases, including: 1) comparing feature distributions learned in different layer  $\ell_1$  and  $\ell_2$ ; 2) comparison of feature distribution learned with two different datasets; 3) one of  $\theta_1$  and  $\theta_2$  is not fully trained. These results not only show that our proposed NNG metric could differentiate the case when two feature distributions for comparison is different, but also provide some very interesting empirical phenomena we find by using our NNG technique.

### A Proof for Theorem 1

We first present the new formulation of Problem (4) after reparameterizing it according to Eqn.(5) below:

$$\begin{aligned}
 & \min_{\tilde{w}, p, \tilde{u}} \frac{1}{N} \sum_{i=1}^N \phi(f(x_i), y_i) + \tilde{R}(\tilde{w}, p, \tilde{u}), \\
 & s.t. \ 1) \int h^{(\ell-1)}(v_i^{(\ell-1)}) * \tilde{w}(v^{(\ell)}, v^{(\ell-1)}) dv^{(\ell-1)} = v_i^{(\ell)} p^{(\ell)}(v^{(\ell)}), \ 2 \leq \ell \leq L, i \in [N]; \\
 & \quad 2) \sum_{v^{(0)} \in \mathcal{V}^{(0)}} v_i^{(0)} * \tilde{w}(v^{(1)}, v^{(0)}) = v_i^{(1)} p^{(1)}(v^{(1)}), i \in [N]; \\
 & \quad 3) \int p^{(\ell)}(v^{(\ell)}) dv^{(\ell)} = 1 \text{ and } p^{(\ell)}(v^{(\ell)}) \geq 0,
 \end{aligned} \tag{7}$$

where the reformulated  $f(x_i)$  and  $\tilde{R}(\tilde{w}, p, \tilde{u})$  take forms of

$$\begin{aligned}
 f(x_i) &= \int h^{(L)}(v_i^{(L)}) \tilde{u}(v^{(L)}) dv^{(L)}, \quad \tilde{R}(\tilde{w}, p, \tilde{u}) = \sum_{\ell=1}^L \lambda^{(\ell)} \tilde{R}^{(\ell)}(\tilde{w}, p) + \lambda^u \tilde{R}^u(\tilde{u}, p), \\
 \text{with } \tilde{R}^{(1)}(\tilde{w}, p) &= \sum_{v^{(0)} \in \mathcal{V}^{(0)}} r_2 \left( \int r_1 \left( \tilde{w}(v^{(1)}, v^{(0)}) \right) dv^{(1)} \right) / p^{(0)}(v^{(0)}),
 \end{aligned}$$

$$\begin{aligned}\tilde{R}^{(\ell)}(\tilde{w}, p) &= \int r_2 \left( \int r_1 \left( \tilde{w}(v^{(\ell)}, v^{(\ell-1)}) \right) dv^{(\ell)} \right) / p^{(\ell-1)}(v^{(\ell-1)}) dv^{(\ell-1)}, \ell \geq 2, \\ \tilde{R}^{(u)}(\tilde{u}, p) &= \int r^{(u)} \left( \tilde{u}(v^{(L)}) \right) / p^{(L)}(v^{(L)}) dv^{(L)}.\end{aligned}$$

397 To prove Theorem 1, we need to prove that problem (7) is convex. First, we need the following  
398 lemma.

399 **Lemma 1.**  $\frac{x^2}{y}$  is convex on  $(x, y) \in [0, +\infty) \times (0, +\infty)$ .

400 The lemma above can be verified by the definition of convex function directly. Now we turn to give  
401 the detailed proof of Theorem 1.

402 *Proof.* Firstly, it is easy to verify that all the constraints 1) to 3) are convex w.r.t.  $\tilde{w}, \tilde{u}$  and  $p$ .

403 For the objective function, we have that the loss  $\phi$  is convex w.r.t.  $\tilde{u}$ . Therefore, we only need to  
404 prove the regularizer  $\tilde{R}(\tilde{w}, p, \tilde{u}) = \sum_{\ell=1}^L \lambda^{(\ell)} \tilde{R}^{(\ell)}(\tilde{w}, p) + \lambda^u \tilde{R}^{(u)}(\tilde{u}, p)$  is convex w.r.t.  $\tilde{w}, \tilde{u}$  and  $p$ .

405 Below, we will prove each item in  $\tilde{R}$  is convex. We first denote

$$\tilde{\Psi}^{(\ell)}(\tilde{w}, p; v^{(\ell-1)}) = \int r_1 \left( \tilde{w}(v^{(\ell)}, v^{(\ell-1)}) \right) dv^{(\ell)},$$

406 then:

407 (1) For the item  $\tilde{R}^{(1)}(\tilde{w}, p)$ , recall that

$$\tilde{R}^{(1)}(\tilde{w}, p) = \sum_{v^{(0)} \in \mathcal{V}^{(0)}} r_2 \left( \tilde{\Psi}^{(1)}(\tilde{w}, p; v^{(0)}) \right) / p^{(0)}(v^{(0)})$$

408 Since we pick  $r_1(w) = \|\text{vec}(w)\|_1$  in this paper, we can have that  $\tilde{\Psi}^{(\ell)}$  is non-negative and convex.

409 Moreover, we notice that  $p^{(0)}$  is constant and  $r_2(w) = w^2$  in this paper, it is easy to know that  
410  $\tilde{R}^{(1)}(\tilde{w}, p)$  is convex.

411 (2) When  $\ell \geq 2$ ,  $\tilde{R}^{(\ell)}(\tilde{w}, p)$  takes the form of

$$\tilde{R}^{(\ell)}(\tilde{w}, p) = \int \frac{r_2 \left( \tilde{\Psi}^{(\ell)}(\tilde{w}, p; v^{(\ell-1)}) \right)}{p^{(\ell-1)}(v^{(\ell-1)})} dv^{(\ell-1)}.$$

412 We denote

$$I(\tilde{w}, p) = \frac{r_2 \left( \tilde{\Psi}^{(\ell)}(\tilde{w}, p; v^{(\ell-1)}) \right)}{p^{(\ell-1)}(v^{(\ell-1)})},$$

413 and let  $p_\gamma = \gamma p_1 + (1 - \gamma)p_2$  and  $\tilde{w}_\gamma = \gamma \tilde{w}_1 + (1 - \gamma)\tilde{w}_2$  for any  $p_1, p_2, \tilde{w}_1, \tilde{w}_2$  and  $\gamma \in [0, 1]$ .

414 Then, we have

$$\begin{aligned}I(\tilde{w}_\gamma, p_\gamma) &= \frac{r_2 \left( \tilde{\Psi}^{(\ell)}(\tilde{w}_\gamma, p_\gamma; v^{(\ell-1)}) \right)}{p_\gamma^{(\ell-1)}(v^{(\ell-1)})} \\ &\leq \frac{r_2 \left( \gamma \tilde{\Psi}^{(\ell)}(\tilde{w}_1, p_1; v^{(\ell-1)}) + (1 - \gamma) \tilde{\Psi}^{(\ell)}(\tilde{w}_2, p_2; v^{(\ell-1)}) \right)}{p_\gamma^{(\ell-1)}(v^{(\ell-1)})} \\ &\leq \gamma \frac{r_2 \left( \tilde{\Psi}^{(\ell)}(\tilde{w}_1, p_1; v^{(\ell-1)}) \right)}{p_1^{(\ell-1)}(v^{(\ell-1)})} + (1 - \gamma) \frac{r_2 \left( \tilde{\Psi}^{(\ell)}(\tilde{w}_2, p_2; v^{(\ell-1)}) \right)}{p_2^{(\ell-1)}(v^{(\ell-1)})} \\ &= \gamma I(\tilde{w}_1, p_1) + (1 - \gamma) I(\tilde{w}_2, p_2).\end{aligned}\tag{8}$$

415 The first inequality in (8) holds since  $\tilde{\Psi}$  is convex and the the second one comes from Lemma 1. Thus

416  $I(\tilde{w}, p)$  is a convex function of  $(\tilde{w}, p)$  and therefore  $\tilde{R}^{(\ell)}(\tilde{w}, p)$  is convex.

417 (3) We denote  $\tilde{u}_\gamma = \gamma\tilde{u}_1 + (1 - \gamma)\tilde{u}_2$ ,  $p_\gamma = \gamma p_1 + (1 - \gamma)p_2$  for any  $\tilde{u}_1, \tilde{u}_2, p_1, p_2$  and  $\gamma \in [0, 1]$   
 418 and recall that

$$\tilde{R}^{(u)}(\tilde{u}, p) = \int r^{(u)}(\tilde{u}(v^{(L)})) / p^{(L)}(v^{(L)}) dv^{(L)}.$$

419 Hence, we have

$$\begin{aligned} \tilde{R}^{(u)}(\tilde{u}_\gamma, p_\gamma) &= \int \frac{(\|\tilde{u}_\gamma(v^{(L)})\|)^2}{p_\gamma^{(L)}(v^{(L)})} dv^{(L)} \\ &\leq \int \frac{(\gamma\|\tilde{u}_1(v^{(L)})\| + (1 - \gamma)\|\tilde{u}_2(v^{(L)})\|)^2}{p_\gamma^{(L)}(v^{(L)})} dv^{(L)} \\ &\leq \int \gamma \frac{\|\tilde{u}_1(v^{(L)})\|^2}{p_1^{(L)}(v^{(L)})} + (1 - \gamma) \frac{\|\tilde{u}_2(v^{(L)})\|^2}{p_2^{(L)}(v^{(L)})} dv^{(L)} \\ &= \gamma \tilde{R}^{(u)}(\tilde{u}_1, p_1) + (1 - \gamma) \tilde{R}^{(u)}(\tilde{u}_2, p_2). \end{aligned}$$

420 The last inequality comes from Lemma 1 and therefore  $\tilde{R}^{(u)}(\tilde{u}, p)$  is a convex function of  $(\tilde{u}, p)$

421 The proof is complete.  $\square$

## 422 B Convergence Analysis

423 We would like to study the relationship of the convex reformulation and gradient descent in the  
 424 original parameter space for continuous DNN. We consider the constrained formulation of continuous  
 425 DNN in (4) and its convex relaxation in (5), with the reparameterization of  $(w, u)$  by  $(\tilde{w}, \tilde{u})$ .

426 In the continuous DNN formulation (4), the network is parameterized with respect to  $(w, p, u)$ .  
 427 However, the typical optimization using SGD or GD modify the network parameters  $(w, u)$  but does  
 428 not modify  $p$  directly. It can be easily seen that changing  $(w, u)$  modifies  $p$  accordingly.

429 When the continuous NN converges, then it reaches a point  $(w_*, p_*, u_*)$  which is stationary with  
 430 respect to the neural network parameters. That is, if we modify  $(w_*, u_*)$ , the objective value does  
 431 not decrease (however, we are not allowed to modify the distribution  $p_*$  directly because it is not an  
 432 explicit part of the DNN parameters, but rather it is an hidden parameter induced by the constraints).

433 Nevertheless the following result shows that under suitable conditions, this point is also stationary  
 434 with respect to the distributional parameter  $p_*$ . That is, if we vary  $(w_*, p_*, u_*)$  arbitrarily, as long as  
 435 the new parameters satisfy the constraints, then the objective value does not decrease.

436 Since the same claim holds for the reparameterization  $(\tilde{w}_*, p_*, \tilde{u}_*)$  in (5). This result shows that  
 437 when the continuous DNN converges, it converges to a solution of the convex reformulation, and this  
 438 establishes a connection between the standard DNN optimization method using SGD, and our convex  
 439 reformulation.

440 **Theorem 2.** Consider an arbitrary point  $(w_*, p_*, u_*)$  of the constrained formulation of continuous  
 441 NN in (4), such that varying the DNN network parameters  $(w_*, u_*)$  cannot decrease the objective  
 442 function. Assume that  $p_*^{(\ell)}(v) \neq 0$  for all  $v$  and  $\ell$ , then  $(\tilde{w}_*, p_*, \tilde{u}_*)$  is a stationary point of the convex  
 443 reformulation reparameterized by (5).

444 *Proof.* (High-level Sketch) We present a highlevel proof that is easier to understand. A more rigorous  
 445 treatment requires heavy notations in differential equations and functional analysis, which we shall  
 446 avoid in this version.

447 The key argument is to show that all variations of  $(\tilde{w}_*, p_*, \tilde{u}_*)$  that satisfy the constraints can be  
 448 achieved by varying  $(w_*, u_*)$  of the continuous DNN parameters, which is commonly used in gradient  
 449 descent optimization algorithms.

450 Let the objective function be  $\tilde{Q}(\tilde{w}, p, \tilde{u}) = Q(w, p, u)$ .

451 To simplify notations, we denote the DNN weights on the  $\ell$ -th layer  $w(v^{(\ell)}, v^{(\ell-1)})$ , and the reparam-  
 452 eterized weight  $\tilde{w}(v^{(\ell)}, v^{(\ell-1)})$  by  $w^{(\ell)}$  and  $\tilde{w}^{(\ell)}$ .

453 Note that we have

$$\langle \nabla_{\tilde{u}} \tilde{Q}(\tilde{w}_*, p_*, \tilde{u}_*), \Delta \tilde{u} \rangle = 0$$

454 for all  $\Delta \tilde{u}$ , since  $Q(w_*, p_*, u_*)$  is a stationary point with respect to network parameter  $u$  and  $p_* > 0$ .  
 455 Here the inner product is with respect to integration over  $v^{(L)}$ .

456 Since the constraints at layer  $\ell$  involve the weight  $\tilde{w}^{(\ell)}$  and density  $p^{(\ell)}$ , therefore to prove the desired  
 457 result, we only need to show that for each  $\ell$ :

$$\langle \nabla_{\tilde{w}^{(\ell)}} \tilde{Q}(\tilde{w}_*, p_*, \tilde{u}_*), \Delta \tilde{w}_*^{(\ell)} \rangle + \langle \nabla_{p^{(\ell)}} \tilde{Q}(\tilde{w}_*, p_*, \tilde{u}_*), \Delta p_*^{(\ell)} \rangle = 0, \quad (9)$$

458 under the infinitesimal transformation (with other layers fixed):

$$\tilde{w}_*^{(\ell)} \rightarrow \tilde{w}_*^{(\ell)} + \epsilon \Delta \tilde{w}_*^{(\ell)}, \quad p_* \rightarrow p_*^{(\ell)} + \epsilon \Delta p_*^{(\ell)},$$

459 when  $\epsilon \rightarrow 0$ , with the constraint

$$\int h^{(\ell-1)}(v_i^{(\ell-1)}) \Delta \tilde{w}_*^{(\ell)}(v^{(\ell)}, v^{(\ell-1)}) dv^{(\ell)} = v^{(\ell)} \Delta p_*^{(\ell)}(v^{(\ell)}).$$

460 Here inner product with respect to  $\Delta \tilde{w}_*^{(\ell)}$  is integration with respect to  $(v^{(\ell)}, v^{(\ell-1)})$ , and inner  
 461 product with respect to  $\Delta p_*^{(\ell)}$  is integration with respect to  $v^{(\ell)}$ .

462 Since the constraint is linear, we can decompose the subspace into two subspaces. Case 1 is  
 463  $\Delta p_*^{(\ell)}(v^{(\ell)}) = 0$ , and Case 2 is  $\Delta p_*^{(\ell)}(v^{(\ell)}) \neq 0$  but  $\int \Delta p_*^{(\ell)}(v^{(\ell)}) dv^{(\ell)} = 0$  and

$$\Delta \tilde{w}_*^{(\ell)}(v^{(\ell)}, v^{(\ell-1)}) = \tilde{w}_*(v^{(\ell)}, v^{(\ell-1)}) \Delta p_*^{(\ell)}(v^{(\ell)}) / p_*^{(\ell)}(v^{(\ell)}). \quad (10)$$

464 It is easy to check that the constraints are satisfied in Case 2.

465 Now to show (9), we only need to show it under these two subspaces, as detailed below.

466 **Case 1:** In this case, we can let

$$\Delta w_*^{(\ell)}(v^{(\ell)}, v^{(\ell-1)}) = \Delta \tilde{w}_*^{(\ell)}(v^{(\ell)}, v^{(\ell-1)}) \frac{1}{p^{\ell-1}(v^{(\ell-1)}) p^{(\ell)}(v^{(\ell)})},$$

467 and consider a change of network parameter

$$w_*^{(\ell)} \rightarrow w_*^{(\ell)} + \Delta w_*^{(\ell)}.$$

468 This change of parameter does not change  $u_*$  and  $p_*$  in the resulting neural network. Since  
 469  $Q(w_*, p_*, u_*)$  is stationary in  $w_*$ , it follows that

$$\langle \nabla_{w_*^{(\ell)}} Q(w_*, p_*, u_*), \Delta w_*^{(\ell)} \rangle = 0,$$

470 which implies (9).

471 **Case 2:** In this case, we consider a change of DNN parameter  $w^{(\ell)}$ , which leads to

$$w_*^{(\ell)}(v^{(\ell)}, v^{(\ell-1)}) \rightarrow w_+^{(\ell)}(v_+^{(\ell)}, v^{(\ell-1)}) = w_*^{(\ell)}(v_+^{(\ell)}, v^{(\ell-1)}) + \epsilon g_\ell(v^{(\ell)}) \omega(v^{(\ell-1)}),$$

472 where variable  $v_+$  is induced by

$$v_+^{(\ell)} = v^{(\ell)} + \epsilon \cdot g_\ell(v^{(\ell)}),$$

473 where we simply pick an arbitrary vector function  $\omega(v)$  so that

$$\int h^{(\ell-1)}(v_i^{(\ell-1)}) \omega_i(v^{(\ell-1)}) p^{(\ell-1)}(v^{(\ell-1)}) dv^{(\ell-1)} = 1.$$

474 With the above transformation, we have the constraint:

$$\int h^{(\ell-1)}(v_i^{(\ell-1)}) w_+(v_+^{(\ell)}, v^{(\ell-1)}) p_+^{(\ell)}(v_+^{(\ell)}) p^{(\ell-1)}(v^{(\ell-1)}) dv^{(\ell-1)} = p_+^{(\ell)}(v_+^{(\ell)}) [v_+^{(\ell)}]_i, \ell \geq 2, i \in [N].$$

475 The corresponding change of distribution is from  $p^{(\ell)}(v)$ , to  $p_+^{(\ell)}(v_+)$ , which is equivalent to the  
 476 distribution of  $p^{(\ell)}(v)$  under the change of variable  $v \rightarrow v_+$ , corresponding to the DNN resulted from  
 477 a change of network parameter  $w_*^{(\ell)} \rightarrow w_+^{(\ell)}$ .

478 Using the Fokker-Planck equation, we have

$$p_+^{(\ell)}(v) = p_*^{(\ell)}(v) - \epsilon \nabla(p_*^{(\ell)}(v)g_\ell(v)) + o(\epsilon),$$

479 and let

$$\Delta p_*^{(\ell)}(v) = p_+^{(\ell)}(v) - p_*^{(\ell)}(v) = -\epsilon \nabla(p_*^{(\ell)}(v)g_\ell(v)) + o(\epsilon).$$

480 It follows that we can keep  $\tilde{w}^{(\ell+1)}$  unchanged by setting

$$w_*^{(\ell+1)}(v^{(\ell+1)}, v^{(\ell)}) \rightarrow w_*^{(\ell+1)}(v^{(\ell+1)}, v^{(\ell)}) \frac{p^{(\ell)}(v^{(\ell)})}{p_+^{(\ell)}(v^{(\ell)})}.$$

481 Note also that

$$\int h^{(\ell-1)}(v_i^{(\ell-1)}) * w_*(v_+^{(\ell)}, v^{(\ell-1)}) p_+^{(\ell)}(v_+^{(\ell)}) p^{(\ell-1)}(v^{(\ell-1)}) dv^{(\ell-1)} = p_+^{(\ell)}(v_+^{(\ell)}) [v_+^{(\ell)}]_i, \ell \geq 2, i \in [N].$$

482 Therefore

$$\int h^{(\ell-1)}(v_i^{(\ell-1)}) * \Delta \tilde{w}'_*(v_+^{(\ell)}, v^{(\ell-1)}) = 0,$$

483 where

$$\Delta \tilde{w}'_*(v_+^{(\ell)}, v^{(\ell-1)}) = [w_+(v_+^{(\ell)}, v^{(\ell-1)}) - w_*(v_+^{(\ell)}, v^{(\ell-1)})] p_+^{(\ell)}(v_+^{(\ell)}) p^{(\ell-1)}(v^{(\ell-1)}).$$

484 Now case 1 implies that

$$\langle \nabla_{\tilde{w}} \tilde{Q}(\tilde{w}_*, p_*, \tilde{u}_*), \Delta \tilde{w}'_* \rangle = 0. \quad (11)$$

485 Note that the stationarity of the DNN network with respect to a change of the network parameter  $w_*^{(\ell)}$   
 486 implies that as  $\epsilon \rightarrow 0$ :

$$\langle \nabla_w Q(w_*, p_*, u_*), \Delta w_* \rangle + \langle \nabla_{p^{(\ell)}} Q(w_*, p_*, u_*), \Delta p_*^{(\ell)} \rangle = o(\epsilon),$$

487 and  $\Delta w_* = w_+ - w_*$ . This equation in the convex reformulation is equivalent to

$$\langle \nabla_{\tilde{w}^{(\ell)}} \tilde{Q}(\tilde{w}_*, p_*, \tilde{u}_*), [\tilde{w}_+^{(\ell)} - \tilde{w}_*^{(\ell)}] \rangle + \langle \nabla_{p^{(\ell)}} Q(\tilde{w}_*, p_*, \tilde{u}_*), \Delta p_*^{(\ell)} \rangle = 0.$$

488 By subtracting (11), we obtain

$$\langle \nabla_{\tilde{w}^{(\ell)}} \tilde{Q}(\tilde{w}_*, p_*, \tilde{u}_*), \Delta \tilde{w}_*^{(\ell)} \rangle + \langle \nabla_{p^{(\ell)}} Q(\tilde{w}_*, p_*, \tilde{u}_*), \Delta p_*^{(\ell)} \rangle = 0,$$

489 where  $\Delta \tilde{w}_*$  is given by (10). This implies (9). It follows by letting  $\epsilon \rightarrow 0$  that for Case 2, (9) holds  
 490 for all

$$\Delta p_*^{(\ell)}(v) = -\nabla(p_*^{(\ell)}(v)g_\ell(v)).$$

491 Since  $g_\ell(v)$  is arbitrary, it is easy to verify that this implies that (9) holds for Case 2 with all possible  
 492  $\Delta p_*^{(\ell)}(v)$  such that

$$\int \Delta p_*^{(\ell)}(v) dv = 0.$$

493 This proves the desired result.  $\square$

## 494 C Missing Algorithms in Main Text

### 495 C.1 Neural Network Graft

496 Here we present the detailed steps of our technique *neural network grafting* (NNG) in Algorithm 1.  
 497 It takes two neural network  $\theta_1$  and  $\theta_2$  as input and output a grafted neural network  $\theta_{(1,2)}$ . In order  
 498 to keep the notations simple to demonstrate our idea, we assume  $\theta_1$  and  $\theta_2$  have the same number  
 499 of layers and the graft algorithm is to compare the feature distributions of layer  $\ell$  in  $\theta_1$  and  $\theta_2$ , i.e.  
 500 graft layer  $\ell$  in  $\theta_1$  onto layer  $\ell + 1$  in  $\theta_2$ . It should be emphasized that Algorithm 1 can be applied to  
 501 the case where  $\theta_1$  and  $\theta_2$  have different numbers of hidden nodes, i.e.,  $m_1^{(\ell)} \neq m_2^{(\ell)}$  in each layer,  
 502 which is used in Section F, and the case where  $\theta_1$  and  $\theta_2$  have different numbers of hidden layers.  
 503 Moreover, NNG can also even be used to compare different layers, for example, compare layer  $\ell_1$   
 504 in  $\theta_1$  and layer  $\ell_2$  in  $\theta_2$  by grafting layer  $\ell_1$  in  $\theta_1$  onto layer  $\ell_2 + 1$  in  $\theta_2$ . We don't explicitly write  
 505 down the algorithm of those cases and the details can be found in Section D (comparing layer with  
 506 different hidden nodes) and Section G.1 (comparing different layers).

---

**Algorithm 1** Neural Network Graft at layer  $\ell$ 

---

**Input:** Dataset  $\{(x_i, y_i)\}_{i=1}^N$  and two networks  $\theta_1$  and  $\theta_2$  with  $\theta_i = (\theta_i^{(1)}, \dots, \theta_i^{(L)}; u_i), i = 1, 2$ .

Allocate a grafted network  $\tilde{\theta}_{(1,2)}$ , whose front  $\ell$  layers' hidden size is same with that of front  $\ell$  layers in  $\theta_1$  (i.e.  $m_{(1,2)}^{(\ell')} = m_1^{(\ell')}$  for  $\ell' \in [\ell]$ ), and back  $L - \ell$  hidden layers' size is same with that of back  $L - \ell$  layers in  $\theta_2$  (i.e.  $m_{(1,2)}^{(\ell')} = m_2^{(\ell')}$  for  $\ell + 1 \leq \ell' \leq L$ ).

Copy weights from  $\theta_1$  and  $\theta_2$  to  $\tilde{\theta}_{(1,2)}$ , i.e.,  $\tilde{\theta}_{(1,2)} = (\theta_1^{(1)}, \dots, \theta_1^{(\ell)}, \tilde{\theta}_{(1,2)}^{(\ell+1)}, \theta_2^{(\ell+2)}, \dots, \theta_2^{(L)}, u_2)$ .

Train  $\tilde{\theta}_{(1,2)}^{(\ell+1)}$  by solving the following problem

$$\min_{\tilde{\theta}_{(1,2)}^{(\ell+1)}} \sum_{i=1}^N \sum_{k=1}^{m^{(\ell+1)}} \|\hat{g}_k^{(\ell+1)}(\tilde{\theta}_{(1,2)}; x_i) - \hat{g}_k^{(\ell+1)}(\theta_2; x_i)\|_2^2. \quad (12)$$

**Return:** The grafted network  $\tilde{\theta}_{(1,2)}$  for evaluation

---

## 507 C.2 Feature Distribution Fusion

508 Here we present Algorithm 2, the detailed optimization-based algorithm to construct a new neural  
 509 network  $\theta_\gamma$  from two nets  $\theta_1$  and  $\theta_2$ . The feature distribution of  $\theta_\gamma$  can be approximately equal to  
 510  $\gamma p_1 + (1 - \gamma)p_2$ , where  $p_1$  and  $p_2$  are the feature distributions of  $\theta_1$  and  $\theta_2$ , respectively.

---

**Algorithm 2** Feature Distribution Fusion

---

**Input:** Training set  $\{(x_i, y_i)\}_{i=1}^N$  and the sets  $\hat{\mathcal{V}}_i^{(\ell)}$  of two CNNs with  $\ell \in [L]$  and  $i = 1, 2$ .

**for**  $\ell = 1, \dots, L$  **do**

Construct a set  $\hat{\mathcal{V}}_\gamma^{(\ell)}$  by sampling  $\gamma m^{(\ell)}$  and  $(1 - \gamma)m^{(\ell)}$  points from  $\hat{\mathcal{V}}_1^{(\ell)}$  and  $\hat{\mathcal{V}}_2^{(\ell)}$ , respectively.

Train  $\bar{w}_\gamma^{(\ell)}$  in the  $\ell$ -th layer of VGG  $\bar{\theta}_\gamma$  by minimizing:

$$L(\bar{w}_\gamma^{(\ell)}) = \frac{1}{m^{(\ell)}N} \sum_{i=1}^N \sum_{v_j^{(\ell)} \in \hat{\mathcal{V}}_\gamma^{(\ell)}} \|\hat{g}_j^{(\ell)}(\bar{\theta}_\gamma; x_i) - v_{j,i}^{(\ell)}\|_2^2 + \lambda^{(\ell)} \hat{R}^{(\ell)}(\bar{w}_\gamma^{(\ell)}). \quad (13)$$

**end for**

Train the output layer by solving:

$$\min_{\bar{u}} \frac{1}{N} \sum_{i=1}^N \phi(\hat{f}(\bar{\theta}_\gamma; x_i), y_i) + \lambda^{(u)} \hat{R}^u(\bar{u}).$$

**Return:** The trained network  $\bar{\theta}_\gamma$ .

---

## 511 D Experimental Configuration

512 In this section, we present the experimental settings and implementation details. We use same  
 513 regularization parameter  $\lambda$  for all layers, i.e.,  $\lambda^{(1)} = \dots = \lambda^{(L)} = \lambda^{(u)} = \lambda$ .

514 **Training  $\theta_1$  and  $\theta_2$**  We denote  $\theta_1$  and  $\theta_2$  to be two standard VGG-16 without batch normalization,  
 515 since batch normalization can change the structure of the networks. The hidden sizes of the last  
 516 two fully-connected layers are both 4096. All models are implemented using Tensorflow [1] and  
 517 we follow the same data augmentation as [16]. Models are trained using stochastic gradient descent  
 518 with momentum 0.9. We fix all of the hyperparameters summarized in Table 1 and only tune the  
 519 initial learning rate and the regularization parameter. Since training neural network with large  
 520 regularization parameter is difficult to converge using the standard initial learning rate 0.01, we vary

521 it in  $\{1e - 2, 5e - 3, 2e - 3, 1e - 3\}$  and select the largest one that could produce robust training results (actually it could attain lowest validation error for that).

Table 1: Hyper-parameters used for training VGG-16

| Hyper-parameter     | Value |
|---------------------|-------|
| Batch size          | 64    |
| Epochs to anneal lr | 60    |
| Anneal rate         | 0.2   |
| Warm-up epochs      | 1     |

522

523 **Training  $\tilde{\theta}_{(1,2)}$  grafted at adjacent layers** To compare the feature functions learned at layer  $\ell$  of  $\theta_1$   
 524 and  $\theta_2$ , we need to train a grafted network  $\tilde{\theta}_{(1,2)}$  connecting two adjacent layers, i.e., layer  $\ell$  of  $\theta_1$   
 525 and layer  $\ell + 1$  of  $\theta_2$ . The detailed training process is as follows: we first train two networks  $\theta_1$  and  
 526  $\theta_2$  using previous configurations and then we train the weight matrix and bias between grafted layer  $\ell$   
 527 and  $\ell + 1$  of the network  $\tilde{\theta}_{(1,2)}$  using our proposed Algorithm 1 and copy all other parameters from  
 528  $\theta_1$  and  $\theta_2$ . We use Adam Optimizer with initial learning rate  $1e - 3$  to optimize the objective Eqn (2).  
 529 The data augmentation is same with as that in training  $\theta_1$  and  $\theta_2$  and number of epochs for training is  
 530 10 for CIFAR-10 and 20 for CIFAR-100.

531 **Training  $\tilde{\theta}_{(1,2)}$  grafted at non-adjacent layers** To determine whether feature function distributions  
 532 of  $\theta_1$  and  $\theta_2$  ( $\theta_1$  and  $\theta_2$  have the same structure) at two different layers are similar or not, we need  
 533 to train a network grafted at non-adjacent layer. The training process is similar to that of grafting  
 534 at adjacent layers. We provide detailed implementations here. Suppose we wish to calculate the  
 535 similarity of feature distributions at layer  $\ell_1$  and  $\ell_2$  in two nets  $\theta_1$  and  $\theta_2$  respectively (that is to  
 536 determine whether the last  $L - \ell_2$  layers in  $\theta_2$  could be grafted on the first  $\ell_1$  layers in  $\theta_1$ ), we  
 537 minimize the feature matching loss w.r.t. parameters  $w_{(1,2)}$ :

$$\frac{1}{N} \sum_{i=1}^N \|\mathcal{P}^o \circ \hat{f}^{(\ell_1)}(\theta_1; x_i) * w_{(1,2)} - \hat{f}^{(\ell_2+1)}(\theta_2; x_i)\|_2^2,$$

538 where  $N$  is the number of training samples,  $o$  is the number of max-pooling operator in layers  
 539  $\ell' \in [\ell_1 + 1, \ell_2]$ ,  $\hat{f}^{(\ell)}(\theta; x)$  and  $\hat{g}^{(\ell)}(\theta; x)$  are pre-activation and post-activation feature map in  
 540  $\mathbb{R}^{W^{(\ell)} \times H^{(\ell)} \times m^{(\ell)}}$ .

541 **Calculating the distance between the parameters of  $\theta_1$  and  $\theta_2$**  We first assume that the alignment  
 542 permutation  $q^{(\ell)}$ , whose  $j$ -th component  $q_j^{(\ell)}$  represent that neuron  $j$  in layer  $\ell$  of network  $\theta_1$  is  
 543 aligned to neuron  $q_j^{(\ell)} \in [m^{(\ell)}]$  in layer  $\ell$  of network  $\theta_2$ , is defined at each layer. We then could use  
 544 the following statistic to measure the difference of  $\theta_1$  and  $\theta_2$  in the parameter matrix space at layer  $\ell$ :

$$\sum_{i=1}^{m^{(\ell)}} \sum_{j=1}^{m^{(\ell-1)}} \|(w_2^{(\ell)})_{q_i^{(\ell)}, q_j^{(\ell-1)}} - (w_1^{(\ell)})_{i,j}\|_2^2 / \left( (\|w_1^{(\ell)}\|_2^2 + \|w_2^{(\ell)}\|_2^2) / 2 \right), \quad (14)$$

545 where  $\|x\|_2$  is the  $\ell_2$  norm of tensor  $x$ 's flattened vector,  $w_1^{(\ell)}, w_2^{(\ell)}$  are weights at layer  $\ell$ ,  $(w_k^{(\ell)})_{i,j}$  is  
 546 a scalar for fully-connected layers and is a flattened 9-dim vector for VGG-16. Here we consider  
 547 a heuristics algorithm to determine  $q^{(\ell)}$  from the input layer to the last hidden layer. For the input  
 548 layer  $\ell = 0$ , the permutation is an identity map, i.e.,  $q_j^{(0)} = j$ , using the nature of image. Now if the  
 549 alignment permutation at layer  $\ell - 1$ , i.e.,  $q^{(\ell-1)}$ , is determined, the alignment permutation at layer  $\ell$   
 550 could be calculated by minimize the objective

$$\min_{q^{(\ell)}} \sum_{i=1}^{m^{(\ell)}} \sum_{j=1}^{m^{(\ell-1)}} \|(w_2^{(\ell)})_{q_i^{(\ell)}, q_j^{(\ell-1)}} - (w_1^{(\ell)})_{i,j}\|_2^2, \quad (15)$$

551 it should be noted that such optimization problem could be written as be a standard problem of  
 552 minimum weighted bipartite matching, i.e., minimizing the following objective

$$\min_{q^{(\ell)}} \sum_{i=1}^{m^{(\ell)}} d_{j, q_j^{(\ell)}} \quad (16)$$

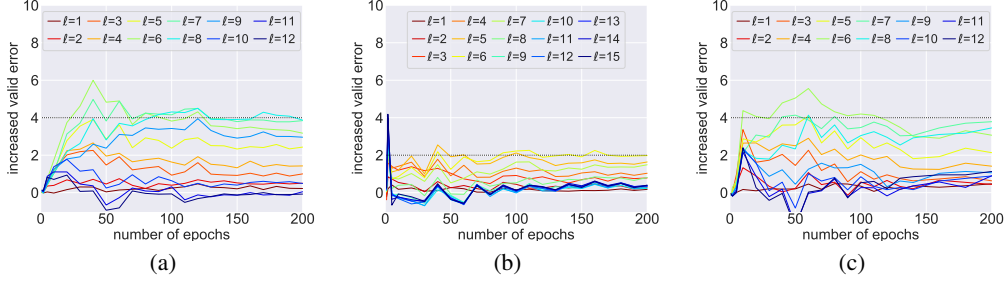

Figure 4: The increased validation error of  $\tilde{\theta}_{(1,2)}$  compared with  $\theta_2$  over the training process. The configuration of  $\theta_1$  and  $\theta_2$  for each subplot could be found in Table 2

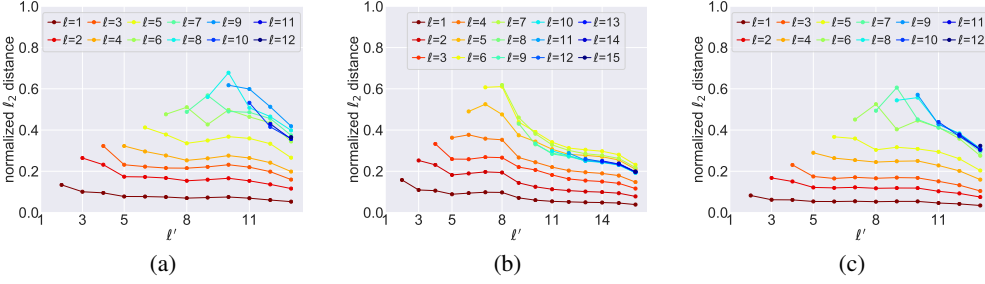

Figure 5: The mean  $\ell_2$  distance (Eqn. (6)) between feature function  $f^{(\ell')}(\theta_2; x)$  and  $f^{(\ell')}(\tilde{\theta}_{(1,2)}; x)$  for each  $\ell' > \ell$ , where  $x$  enumerates the training data.  $\tilde{\theta}_{(1,2)}$  is grafted at layer  $\ell$ . The configuration of  $\theta_1$  and  $\theta_2$  for each subplot could be found in Table 2

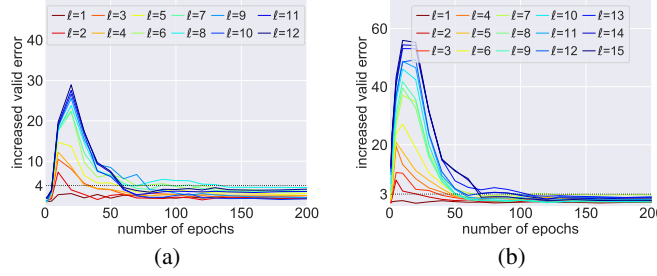

Figure 6: The increased validation error of  $\tilde{\theta}_{(1,2)}$  compared with  $\theta_2$  over the training process.  $\theta_1$  and  $\theta_2$  are (a) VGG-16 trained on CIFAR-100 and (b) VGG-19 trained on CIFAR-10.

553 , where  $d_{i,j} = \sum_{k=1}^{m^{(\ell-1)}} \|(w_2^{(\ell)})_{i,q_k^{(\ell-1)}} - (w_1^{(\ell)})_{j,k}\|_2^2$ . This optimization problem could be solved in  
554  $O((m^{(\ell)})^3)$  using Hungarian Algorithm.

## 555 E Additional Experiments on Other Datasets, Architectures, and 556 Regularizer

557 In this section, we show that our empirical findings found by our NNG technique is consistent across  
558 different datasets, architectures and regularizers, and provide more explanations. We consider three  
559 type of configurations, which is listed in the following Table 2.

Table 2: Configurations for Additional Experiments

| Index | Dataset   | Architecture | Regularizer  |
|-------|-----------|--------------|--------------|
| a     | CIFAR-100 | VGG-16       | $\ell_{1,2}$ |
| b     | CIFAR-10  | VGG-19       | $\ell_{1,2}$ |
| c     | CIFAR-100 | VGG-16       | $\ell_2$     |

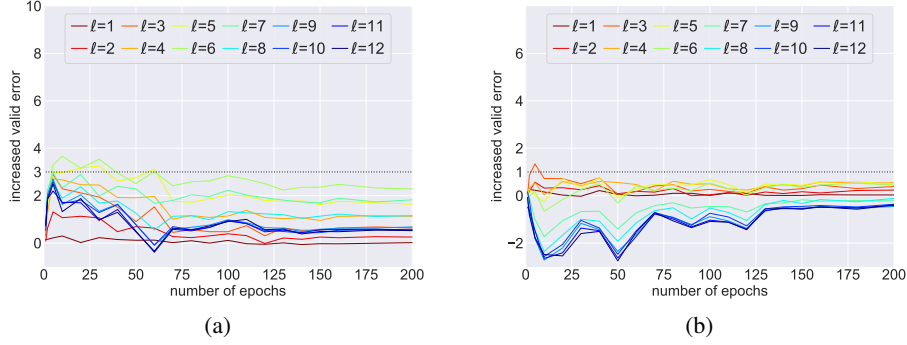

Figure 7: The increased validation error of  $\tilde{\theta}_{(1,2)}$  compared with  $\theta_2$  over the training process, where (a)  $\theta_1$  is standard VGG-16 and  $\theta_2$  has twice number of hidden nodes/channels compared with  $\theta_1$  (b)  $\theta_2$  is standard VGG-16 and  $\theta_1$  has twice number of hidden nodes/channels compared with  $\theta_2$ . Both of the networks are trained using  $\ell_{1,2}$  regularizer on CIFAR-10 dataset.

In the following, we demonstrate that our findings on 1) uniqueness of solution path; 2) the evidence of feature redundancy; 3) evidence of convexity found by NNG are consistent across these configurations. The training settings for  $\theta_1$ ,  $\theta_2$ , the intermediate saved checkpoints, and training settings for  $\tilde{\theta}_{(1,2)}$  are the same with respect to that in main text.

**Uniqueness of Solution Path.** We first show that the feature distributions learned by  $\theta_1$  and  $\theta_2$  trained from two different initializations are similar though the entire training process. Fig.4 plots the increased validation error of  $\tilde{\theta}_{1,2}$  compared with  $\theta_2$  as training goes on. It is observed that the error is bounded in the low-error region, indicating that  $\theta_1$  and  $\theta_2$  learn similar feature distribution during the entire training process in all of these configurations.

**Evidence of Feature Redundancy.** In the main text, we claim that a large amount of error, the  $\ell_2$  difference between features of  $\tilde{\theta}_{1,2}$  and that of  $\theta_2$  in layer  $\ell + 1$  introduced by grafting at layer  $\ell$  is caused by redundancy, which have little effect on the feature function in subsequent layers. We show such phenomenon could also be found in the configurations above. As illustrated in Fig.5, the mean  $\ell_2$  distance between  $\hat{f}^{(\ell')}(\tilde{\theta}_{(1,2)}; x)$  and  $\hat{f}^{(\ell')}(\theta_2; x)$  decreases as layer  $\ell'$  increase.

**Convergence to Same Point** Similar to the settings in the main text, we use our NNG technique to check whether the feature distributions learned in two nets  $\theta_1$  and  $\theta_2$  initialized with two different methods (i.e.,  $he_{uniform}$  and  $he_{normal}$ ) converge to the same distribution as the training process goes on. The configurations of  $\theta_1$  and  $\theta_2$  are chosen from (a) and (b) in Table 2, i.e.,  $\theta_1$  and  $\theta_2$  are VGG-16 trained on CIFAR-100, or  $\theta_1$  and  $\theta_2$  are VGG-19 trained on CIFAR0-10. For saved checkpoints, we graft each layer  $\ell$  of  $\theta_1$  onto layer  $\ell + 1$  of  $\theta_2$  and the results are presented in Fig.6. We can see that the increased valid error of  $\tilde{\theta}_{(1,2)}$  grafted at each layer is very high in the beginning (since  $\theta_1$  and  $\theta_2$  are initialized with two quite different feature distributions) and decreases quickly as training process goes on, and finally almost all the curves finally bounded in low-error region. This implies that the feature distributions learned by  $\theta_1$  and  $\theta_2$  start from different points and converge to a same point.

## F VGG is Over-parameterized Enough in Feature Distribution View

In this section, we conduct experiments to show that VGG-16 are overparameterized enough. To be precise, we verify this point by showing that the feature representations learned by VGG-16 are stable, in a sense that, the learned feature representations would be quite similar if we increase the numbers of channels/hidden nodes in each layer of VGG-16 by 2 times.

We first train two networks  $\theta_1$  and  $\theta_2$  on CIFAR-10, where one of  $\theta_1$  and  $\theta_2$  is a standard VGG-16 and the other is VGG-16 with twice number of hidden nodes/channels compared with the standard one. We compare the feature distributions learned in them during the training process by grafting the checkpoints of  $\theta_1$  and  $\theta_2$  saved at the same time-step together, just as we did in the experiments for showing the uniqueness of same solution path in the main text. The results are shown in Fig.7. We

could see that the increased validation of  $\tilde{\theta}_{(1,2)}$  compared with  $\theta_2$  is accumulated in low-error region for all layers and time-steps, which verifies our claim empirically.

## G Additional Findings

### G.1 Feature Distributions Comparison between Different Layers

We next use our proposed NNG metric to compare the similarity of feature function distributions between different layers, i.e., layer  $\ell_1$  of  $\theta_1$  and layer  $\ell_2$  of  $\theta_2$ . Here  $\theta_1$  and  $\theta_2$  are neural network trained from two different initializations with same  $\ell_{1,2}$  regularizer on same dataset,  $\tilde{\theta}_{(1,2)}$  is the network grafted at two non-adjacent layers. To specific, we use the feature representations at layer  $\ell_1$  in  $\theta_1$  to be the input for the feature representations at layer  $\ell_2 + 1$  in  $\theta_2$  and train the weights and bias parameters using a  $\ell_2$  regression loss, see Section D for details. The increased validation error of  $\tilde{\theta}_{(1,2)}$  compared with  $\theta_2$  is reported in Fig. 8. From Fig. 8a), we can see that for the fully trained VGG-16 on CIFAR10, the feature representations in the layers near the input are relatively different from each other, while those learned in the layers near the output are similar with each other. We can also observe that the feature representations learned in the six layers near the input are quite different from those learned in the subsequent layers, since when two of them are grafted together, the validation error increases significantly by at least 20%. To the best of our knowledge, we are the first to find this property of DNNs in feature learning.

Another observation is the *measured similarity between different layers using our NNG metric is different for small and large regularization parameters*. Since the results and core conclusions are similar for CIFAR-10 and CIFAR-100, we just provide analysis for CIFAR-10 below. To be precise, Fig. 8b) shows that for large regularization parameter  $\lambda = 10$ , the back seven layers near output are almost the same, while when it comes to small regularization parameter  $\lambda = 1$  only five layers near the output are similar.

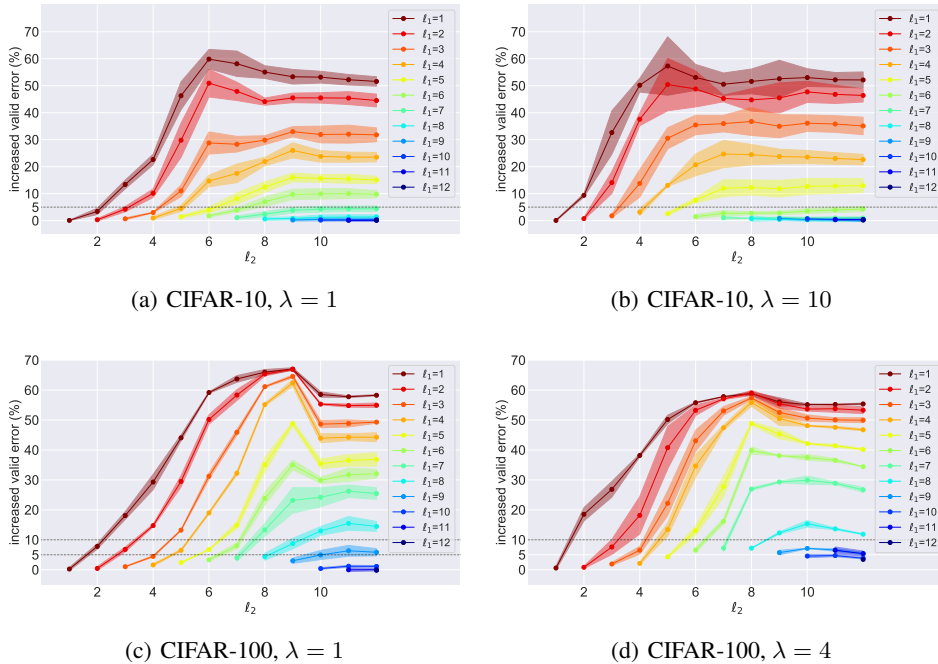

Figure 8: The increased validation error of  $\tilde{\theta}_{(1,2)}$  compared with  $\theta_2$ , where  $\theta_1$  and  $\theta_2$  are trained VGG-16 using same  $\ell_{1,2}$  regularizer parameter but different initialization. For each curve denote as  $\ell_1$ , we plots the increased validation error when we directly graft the first  $\ell_1$  layers in  $\theta_1$  on the  $\ell_2 + 1$ -th layer in  $\theta_2$ , which demonstrate whether the feature functions at layer  $\ell_1$  in  $\theta_1$  is similar to that at layer  $\ell_2$  in  $\theta_2$ . The shadowed regions represent the 95% confidence interval.

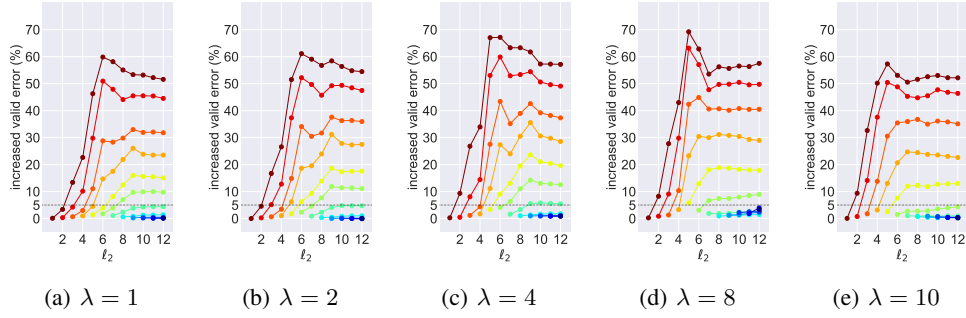

Figure 9: The increased validation error of  $\tilde{\theta}_{(1,2)}$  compared with  $\theta_2$ , where  $\theta_1$  and  $\theta_2$  are trained VGG-16 using same  $\ell_{1,2}$  regularizer parameter but different initialization. For each curve denote as  $\ell_1$  (we omit the legend of  $\ell_1$  here and it is same to that in Fig 8), we plots the increased validation error when we directly graft the first  $\ell_1$  layers in  $\theta_1$  on the  $\ell_2 + 1$ -th layer in  $\theta_2$ , which demonstrate whether the feature functions at layer  $\ell_1$  in  $\theta_1$  is similar to that at layer  $\ell_2$  in  $\theta_2$ .

618 The above observation indicates that: 1) our proposed NNG metric can differentiate the similarity  
 619 and difference effectively; 2) larger regularization parameter will promote more layers near the final  
 620 output of a neural network to learn similar feature representations.

621 To better demonstrate 2), we further analyze the results about how these curves change when  $\lambda$  varies  
 622 from 1 to 10, the results are shown in Fig 9. We could draw two observations of curves' changes  
 623 if we choose 5% as the threshold to differentiate similar or not. One is that the front several layers  
 624 are similar with their adjacent layers when  $\lambda$  is small, when  $\lambda$  becomes larger, these adjacent layers  
 625 become different. The other is more layers near the output become similar when  $\lambda$  becomes larger.

## 626 G.2 Feature Distributions Learned on Different Datasets

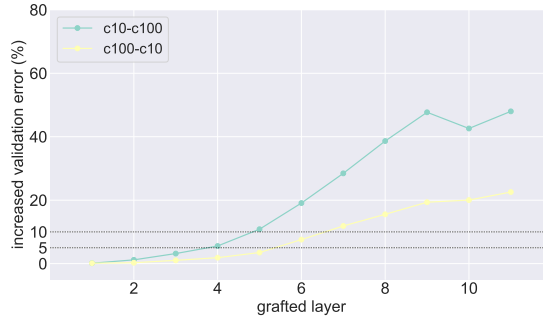

Figure 10: The increased validation error of  $\tilde{\theta}_{(1,2)}$  compared with  $\theta_2$ , where  $\theta_1$  and  $\theta_2$  are trained VGG-16  $\ell_{1,2}$  regularizer with parameter  $\lambda = 1$  but different initialization and different dataset.  $\theta_1$  and  $\theta_2$  are trained with CIFAR-10 and CIFAR-100 respectively for curve 'c10-c100' and are trained with CIFAR-100 and CIFAR-10 respectively for the curve 'c100-c10'

627 In the section, we investigate the similarity of feature representations learned on different datasets. To  
 628 be specific, we train two networks  $\theta_1$  and  $\theta_2$  on CIFAR-10 and CIFAR-100, respectively and compare  
 629 the feature representations learned by them using our NNG technique. The increased validation error  
 630 of  $\tilde{\theta}_{(1,2)}$  compared with  $\theta_2$  is shown in Fig.10, from which we can draw the following conclusions:

- 631 1. Our proposed NNG metric can clearly identify whether two feature learned from different  
 632 dataset are similar or not. We can see that the feature representations learned from different  
 633 datasets are quite similar in the layers near the input layer while have a large gap in the  
 634 layers near the final output.

635 2. We could see that the performance of grafted network  $\tilde{\theta}_{(1,2)}$  comprised of the near-input  
636 layers of the network trained CIFAR-10 and the near-output layers of the network on CIFAR-  
637 100 is significant worse than the one comprised the near-input layers of the network on  
638 CIFAR-100 and the near-output layers on CIFAR-10, this could be contributed to two factors:  
639 1) CIFAR-100 task is more difficult than CIFAR-10 task; 2) the feature representation learned  
640 on CIFAR-100 are more diverse.

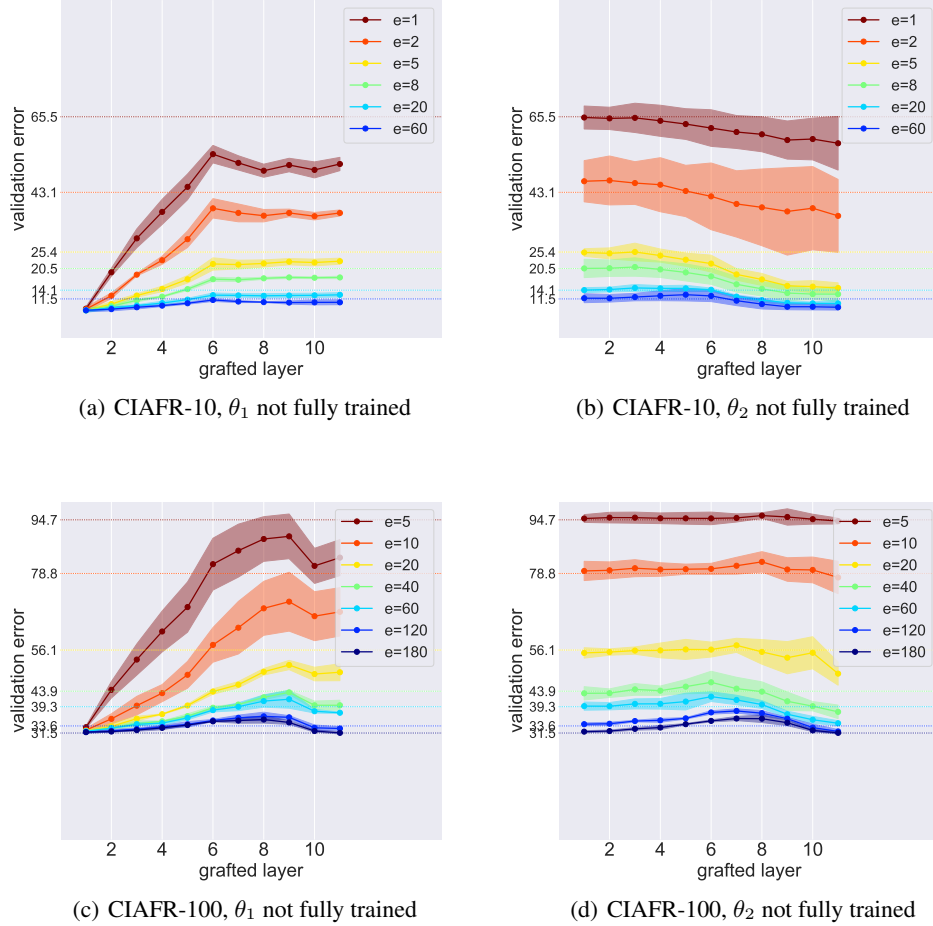

Figure 11: Increased validation performance of  $\tilde{\theta}_{(1,2)}$  compared with  $\theta_2$ . The shadowed regions represent the 95% confidence interval. For each subplot,  $e = [u]$  represents  $\theta_k$  is the model after  $u$  training epochs and the other network is the converged model. The dotted line is the validation error of corresponding  $\theta_k$  after  $u$  training epochs.

### 641 G.3 Feature Distributions Learned at Different Stages

642 In this section, we consider the case where one of  $\theta_1$  and  $\theta_2$  is not fully trained. Fig 11 shows that:  
643 1) our proposed metric is identifiable to the case when one of  $\theta_1$  and  $\theta_2$  has not trained to optimal;  
644 2) the performance gap between the grafted NN and the original NN quickly decreases to zero for  
645 the previous few layers and slowly decreases for the last few layers. This indicates that the feature  
646 functions in the previous few layers converge much faster than that of the last few layers.
